# Supplementary material for: Organocatalytic synthesis of (Het)biaryl scaffolds via photoinduced intra/intermolecular C(sp2)–H arylation by 2-pyridone derivatives
Source: Royal Society of Chemistry journal article supplement (doi:10.1039/d1ob01798e), 2021-11-30
Supplement: d1ob01798e1.pdf [file d1ob01798e1.pdf]

## ***-Supporting Information-***

### **Organocatalytic Synthesis of (Het)biaryl Scaffolds *via* Photoinduced Intra/Inter Molecular C(sp<sup>2</sup>)-H Arylation by 2-pyridone Derivative**

**Tapas K. Das<sup>†¶</sup>, Mrinalkanti Kundu<sup>†\*</sup>, Biswajit Mondal<sup>†¶</sup>, Prasanjit Ghosh<sup>¶\*</sup> and Sajal Das<sup>¶\*</sup>**

*†TCG Lifesciences Pvt. Ltd., BN-7, Sector V, Salt Lake City, Kolkata- 700091, India*

*¶Department of Chemistry, University of North Bengal, Darjeeling – 734013, India*

| <b>Sl. No.</b> | <b>Contents</b>                                                                                                      | <b>Page No.</b> |
|----------------|----------------------------------------------------------------------------------------------------------------------|-----------------|
| <b>1</b>       | KIE study via parallel experiment                                                                                    | <b>S3</b>       |
| <b>2</b>       | <i><sup>1</sup>H NMR &amp; <sup>13</sup>C NMR Spectral Data of L1-L3</i>                                             | <b>S4-S6</b>    |
| <b>3</b>       | <i><sup>1</sup>H NMR, <sup>13</sup>C NMR, &amp; <sup>19</sup>F NMR Spectral Data of compound 3a-o</i>                | <b>S7-S22</b>   |
| <b>4</b>       | <i><sup>1</sup>H NMR &amp; <sup>13</sup>C NMR Spectral Data of 3s-t</i>                                              | <b>S23-S24</b>  |
| <b>5</b>       | <i><sup>1</sup>H NMR, <sup>13</sup>C NMR &amp; <sup>19</sup>F NMR Spectral Data of compound 7a-c</i>                 | <b>S25-S34</b>  |
| <b>6</b>       | <i><sup>1</sup>H NMR, <sup>13</sup>C NMR Spectral Data of compound 3p-3q, 1r, 3r</i>                                 | <b>S35-S38</b>  |
| <b>7</b>       | <i><sup>1</sup>H NMR, <sup>13</sup>C NMR Spectral Data of compound 11a-c, 12a-b, 13 &amp; HMBC, HSQC data of 11b</i> | <b>S39-S45</b>  |
| <b>8</b>       | <i><sup>1</sup>H NMR Spectra of 3a-d<sub>5</sub></i>                                                                 | <b>S46</b>      |
| <b>9</b>       | <i>Images of UV-light irradiation set up</i>                                                                         | <b>S47</b>      |
| <b>10</b>      | <i>UV-absorption spectra of L1 and its salt</i>                                                                      | <b>S47-S51</b>  |

# 1: KIE study via parallel experiment

## Kinetic isotope effect via parallel experiment

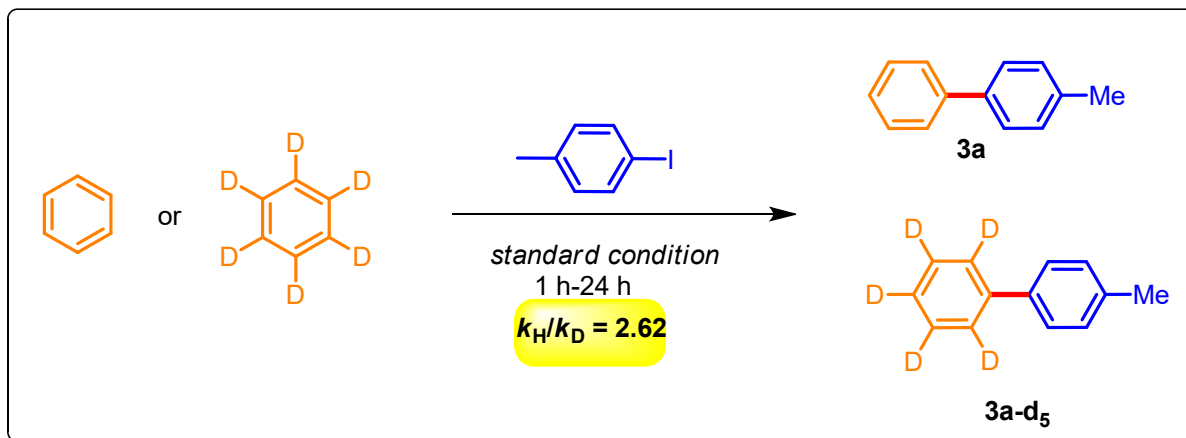

| time (hr)                    | 1  | 2  | 6  | 24 |
|------------------------------|----|----|----|----|
| 3a (yield; %)                | 19 | 20 | 23 | 82 |
| 3a-d <sub>5</sub> (yield; %) | 70 | 72 | 74 | 95 |

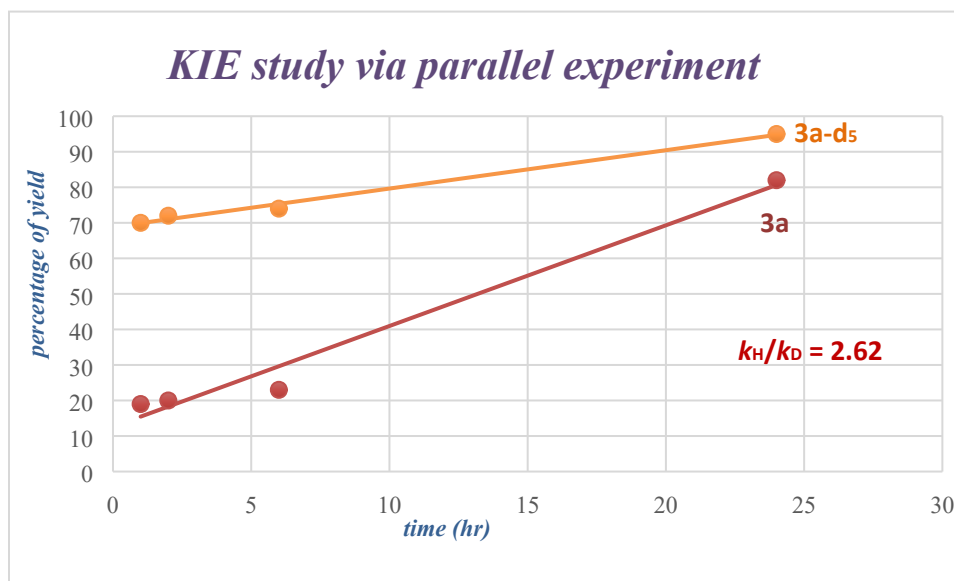

Characterization data:  $^1\text{H}$  NMR,  $^{13}\text{C}$  NMR Spectral data of compound L1-L3

$^1\text{H}$  &  $^{13}\text{C}$  NMR spectra of L1

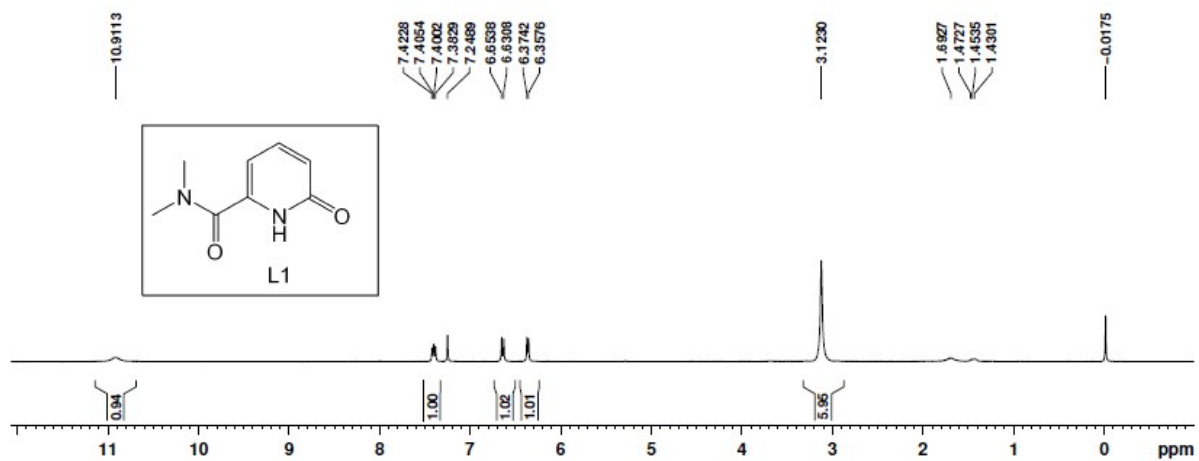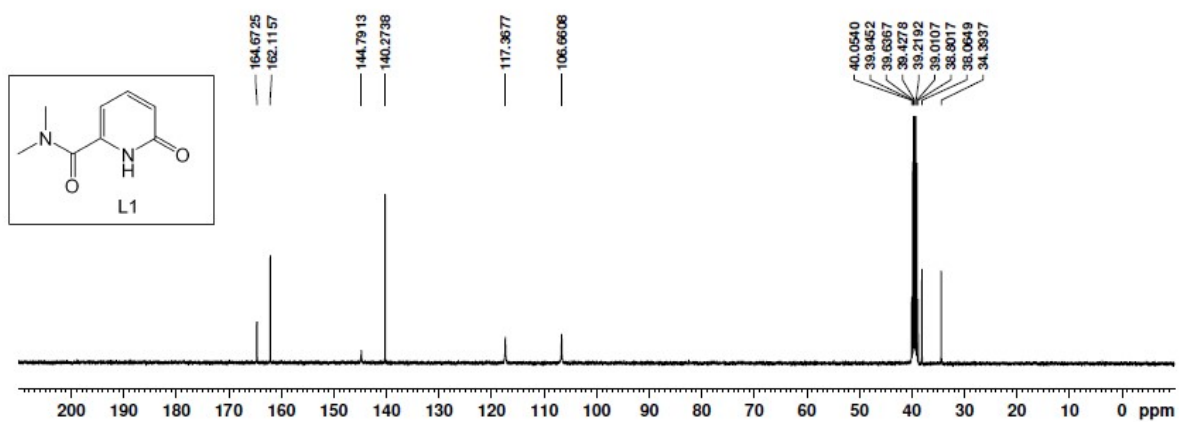

# <sup>1</sup>H & <sup>13</sup>C NMR spectra of L2

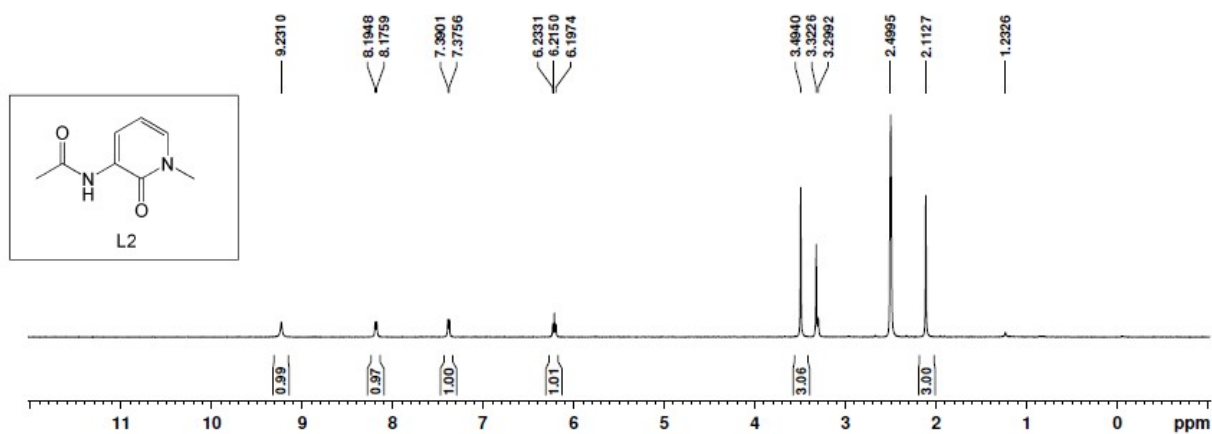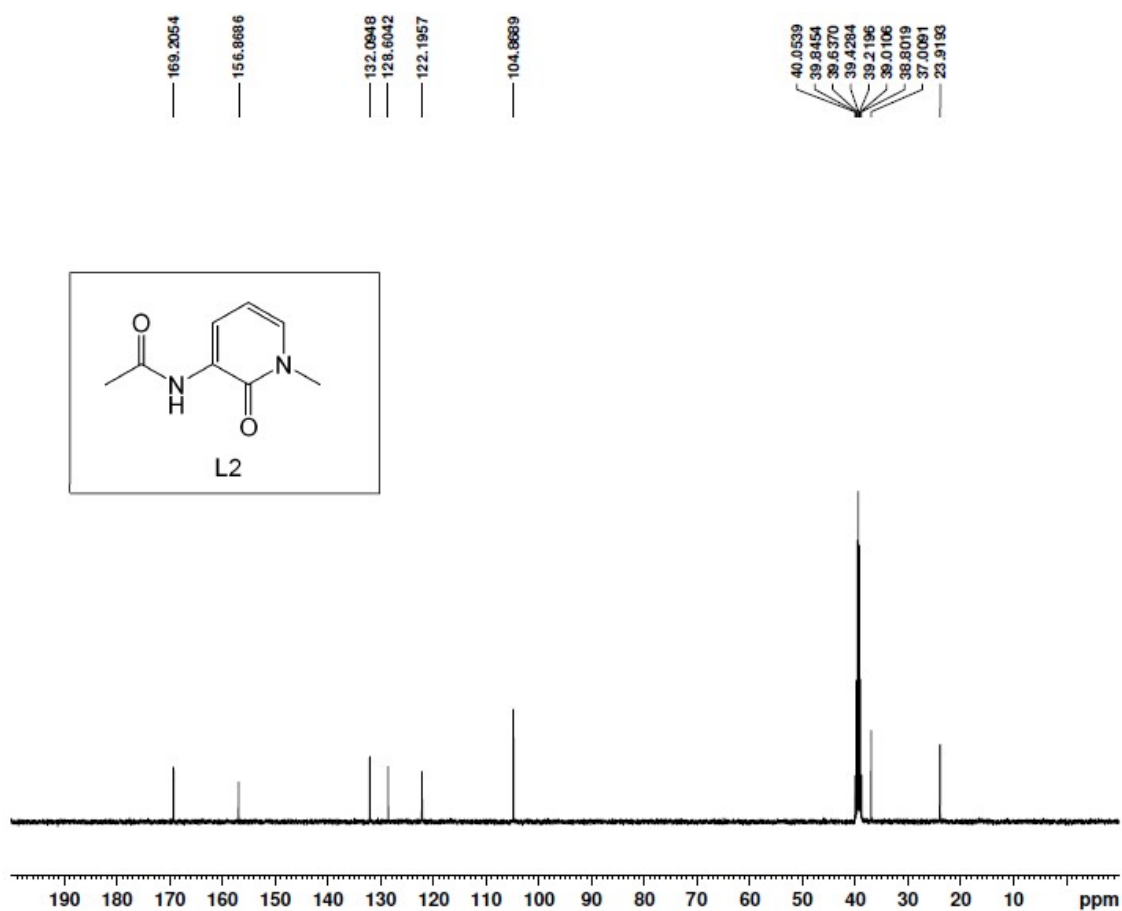

# <sup>1</sup>H & <sup>13</sup>C NMR spectra of L3

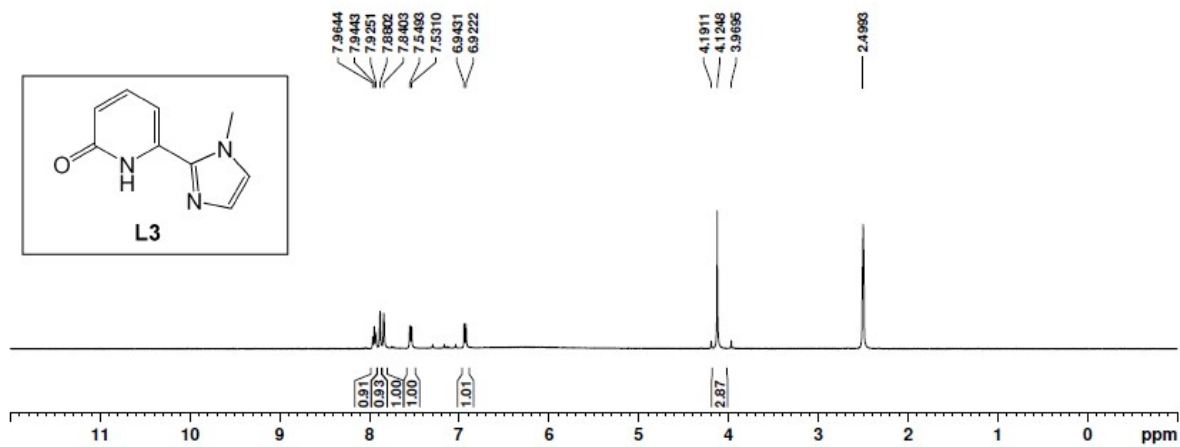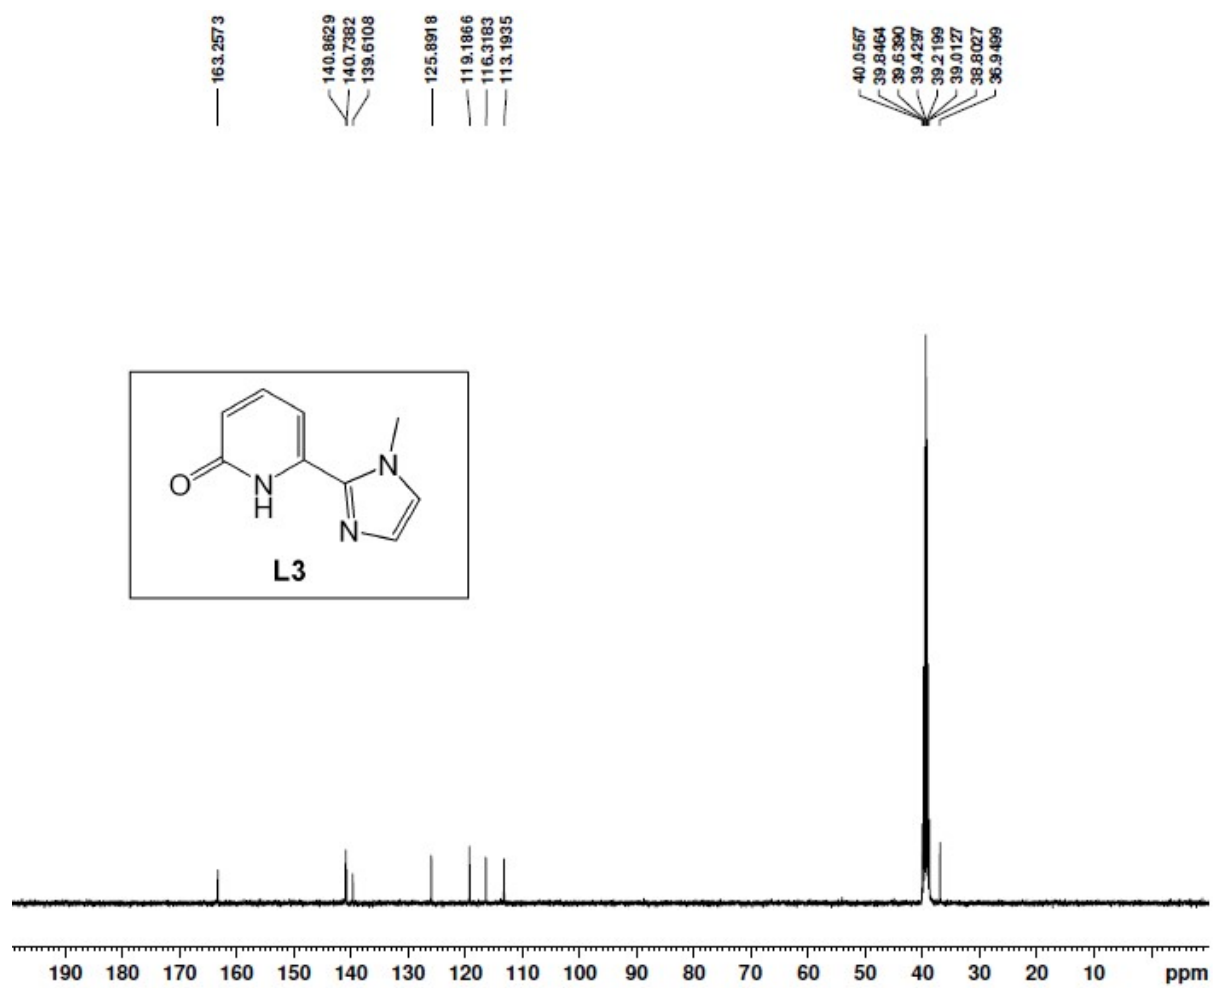

## 2: Characterization data: $^1\text{H}$ NMR, $^{13}\text{C}$ NMR & $^{19}\text{F}$ NMR Spectral data of compound **3a-o**

### $^1\text{H}$ & $^{13}\text{C}$ spectra of **3a**

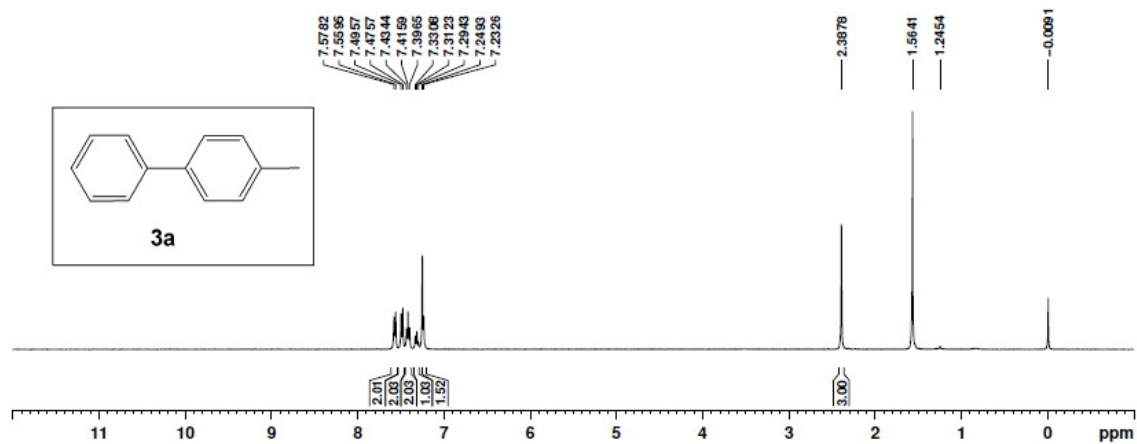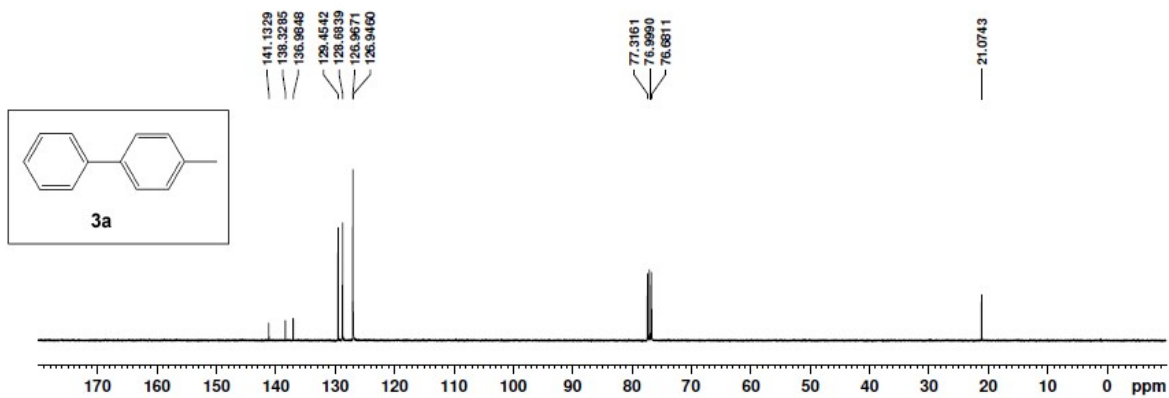

# <sup>1</sup>H & <sup>13</sup>C NMR spectra of 3b

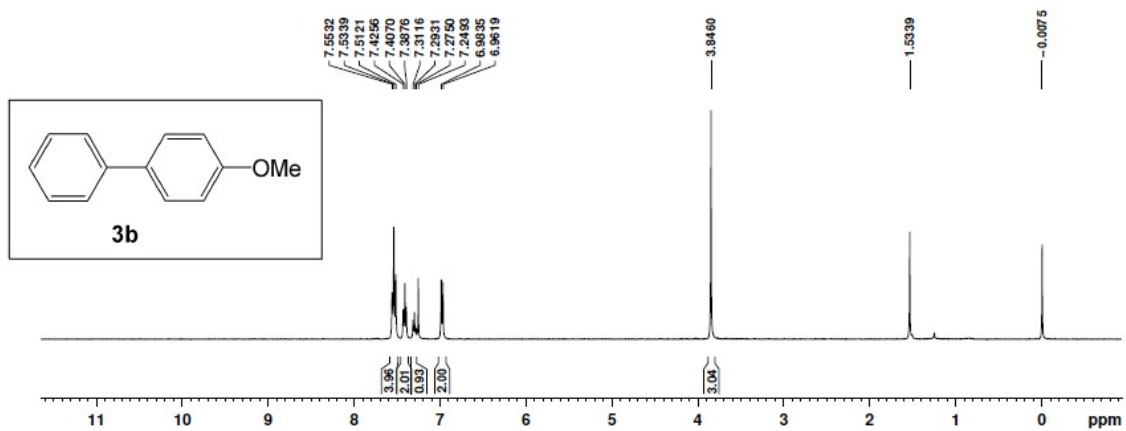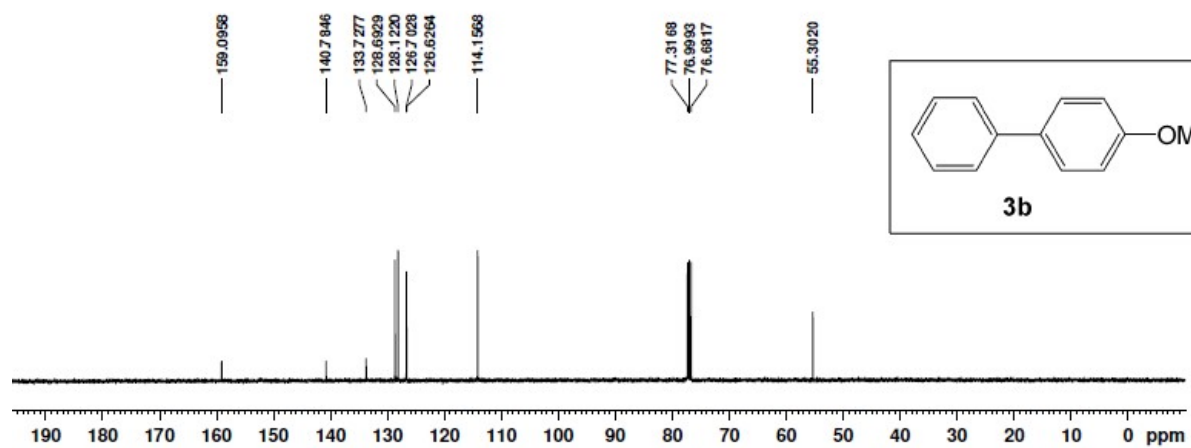



# $^1\text{H}$ & $^{13}\text{C}$ NMR spectra of 3c

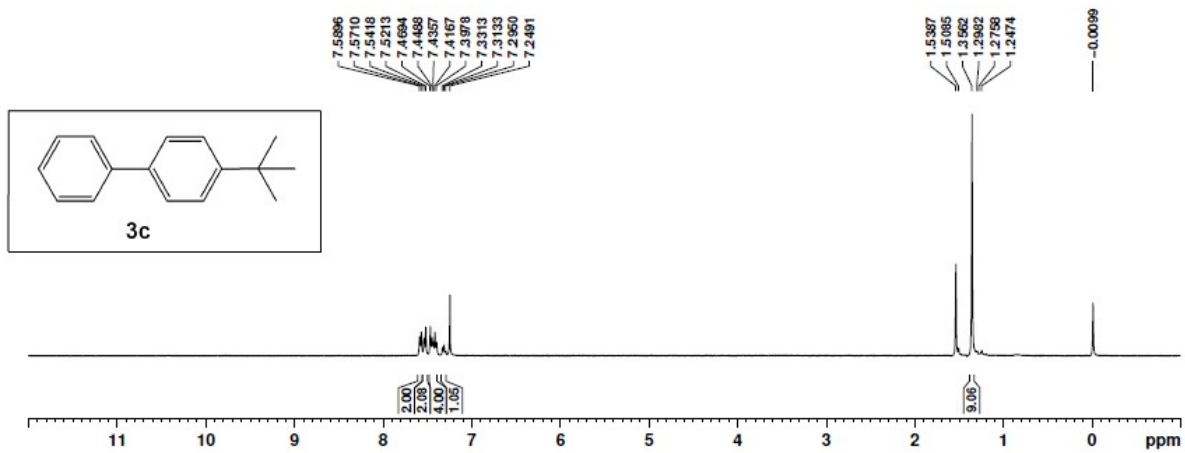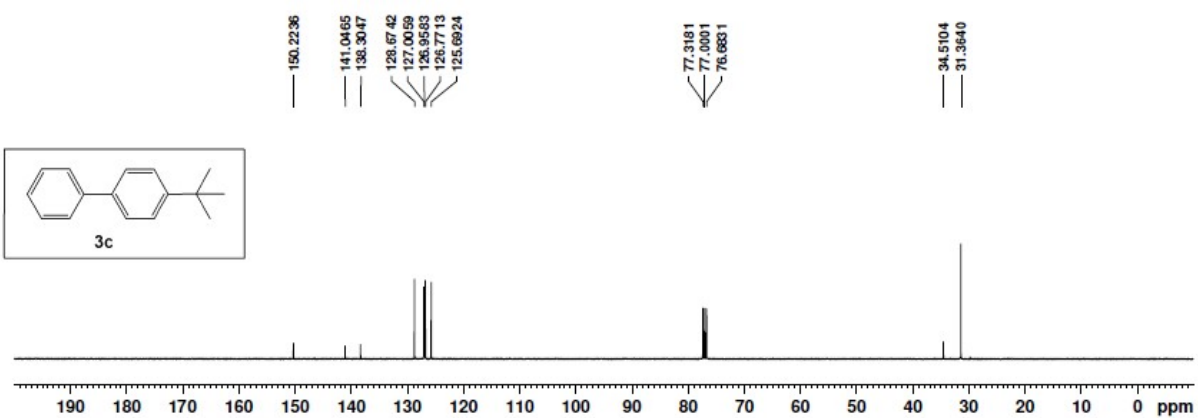

### <sup>1</sup>H NMR spectra of 3d

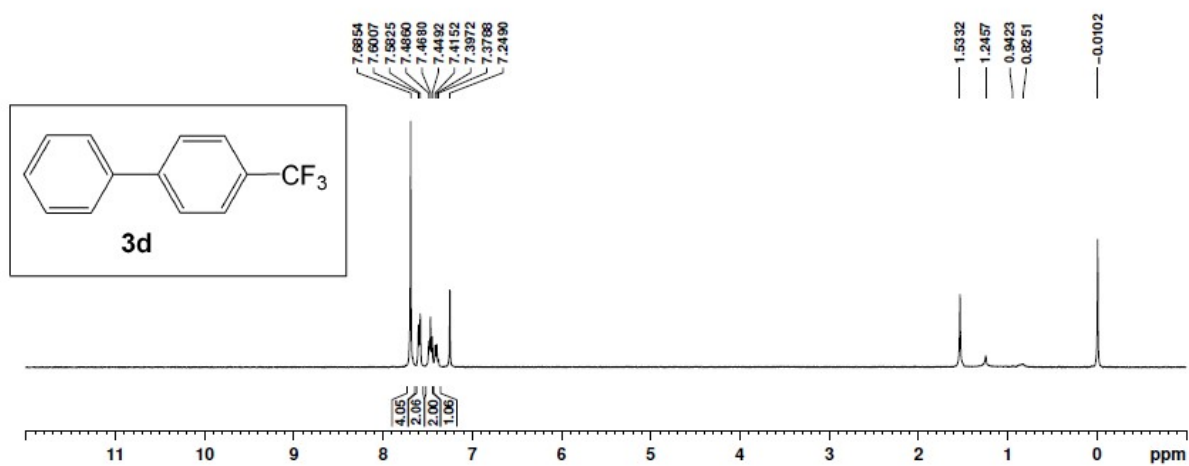

### <sup>13</sup>C NMR spectra of 3d

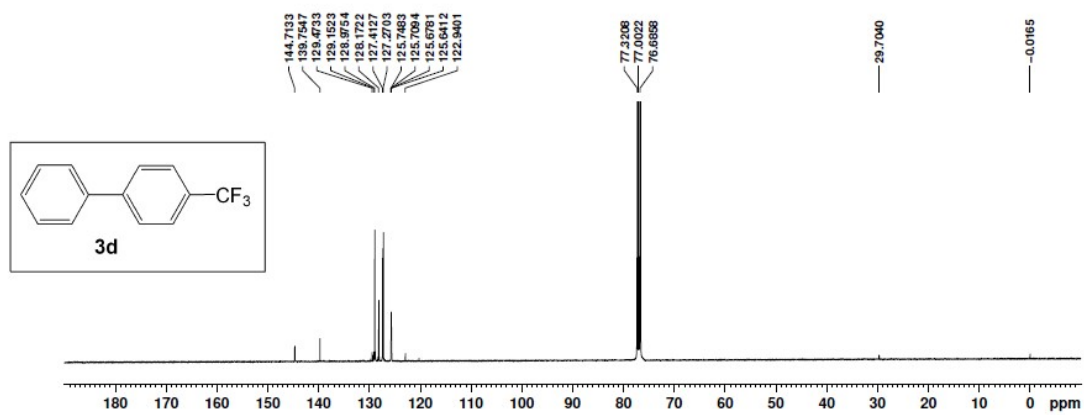

**$^{19}\text{F}$  NMR spectra of 3d**

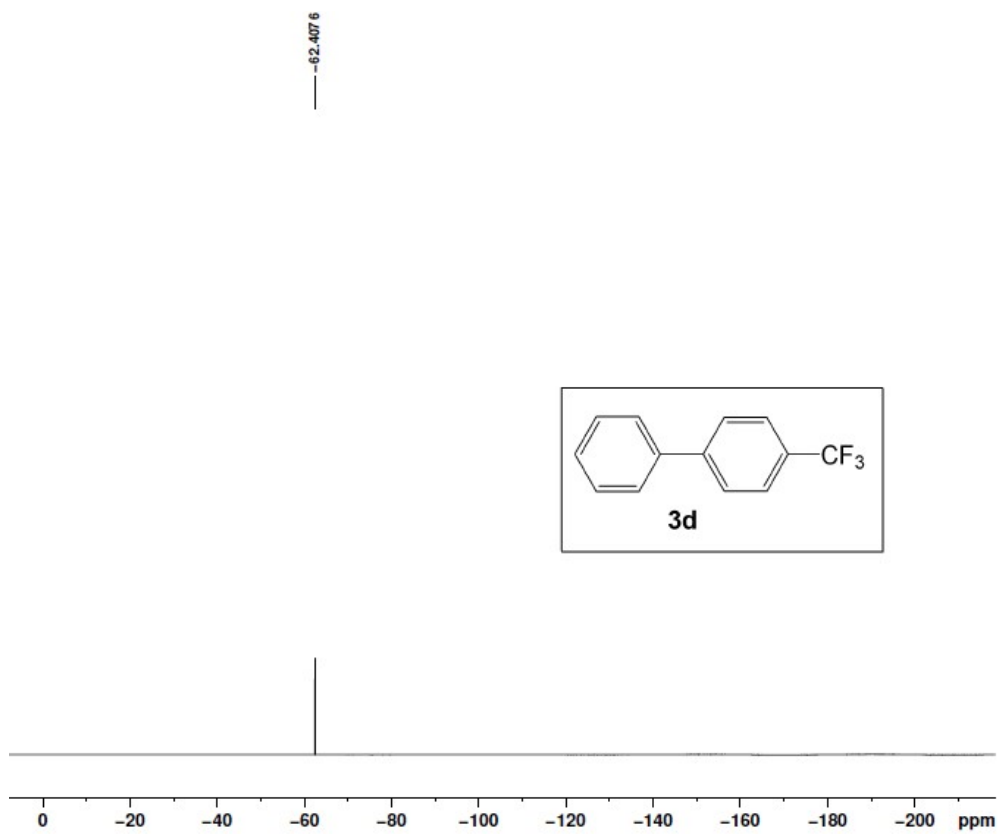

# $^1\text{H}$ & $^{13}\text{C}$ NMR spectra of 3e

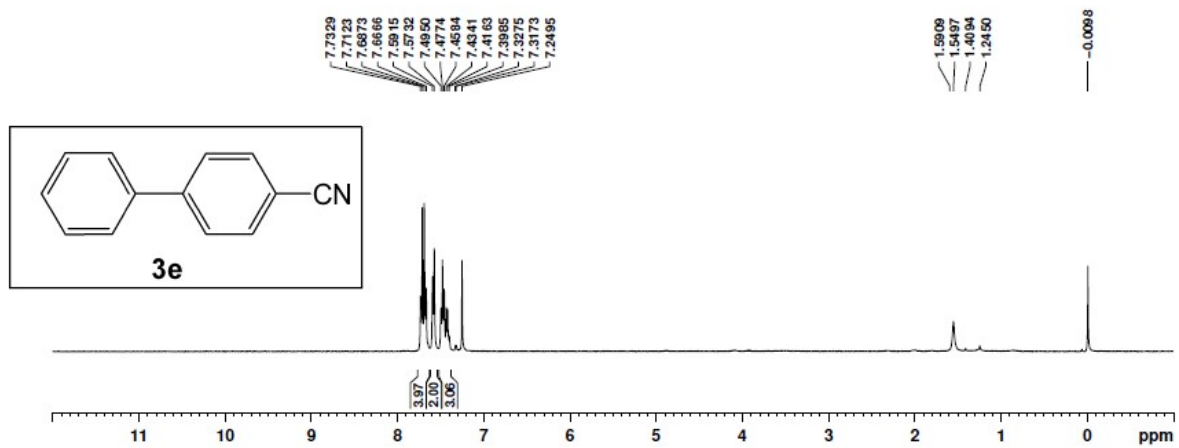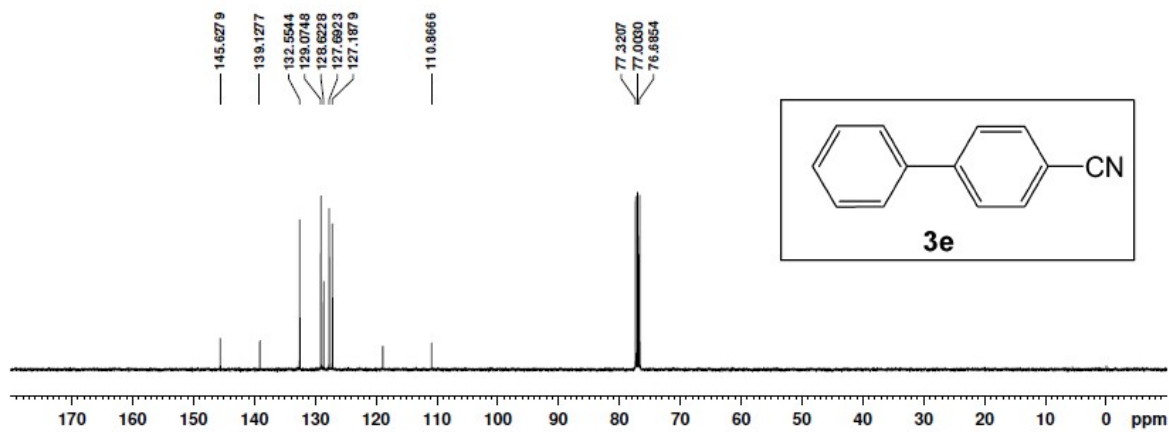

### <sup>1</sup>H NMR spectra of 3f

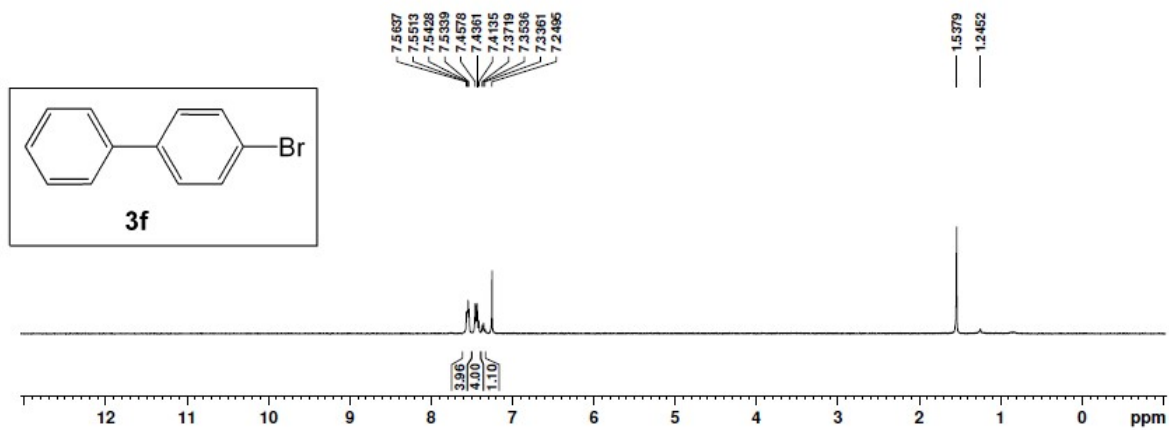

### <sup>13</sup>C NMR spectra of 3f

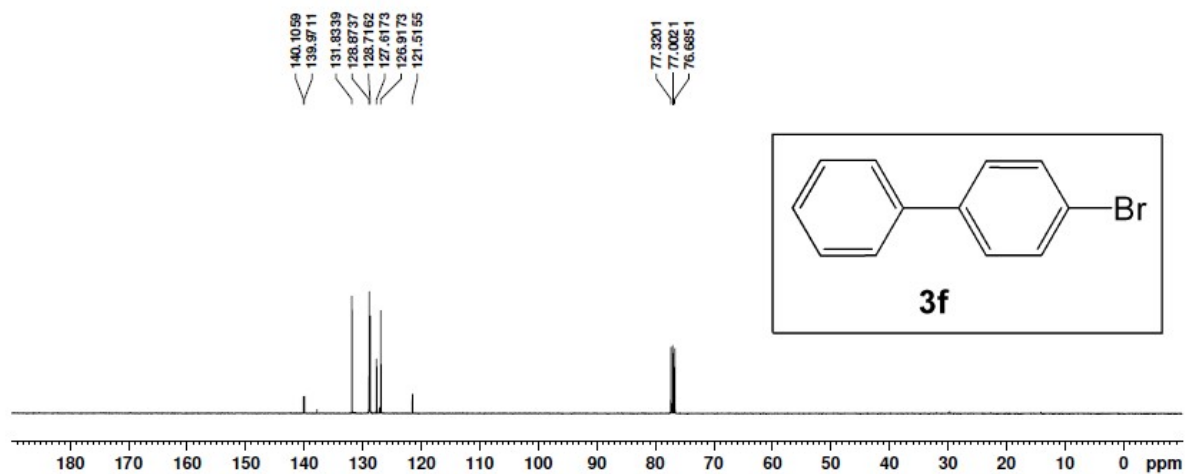

# $^1\text{H}$ & $^{13}\text{C}$ NMR spectra of 3g

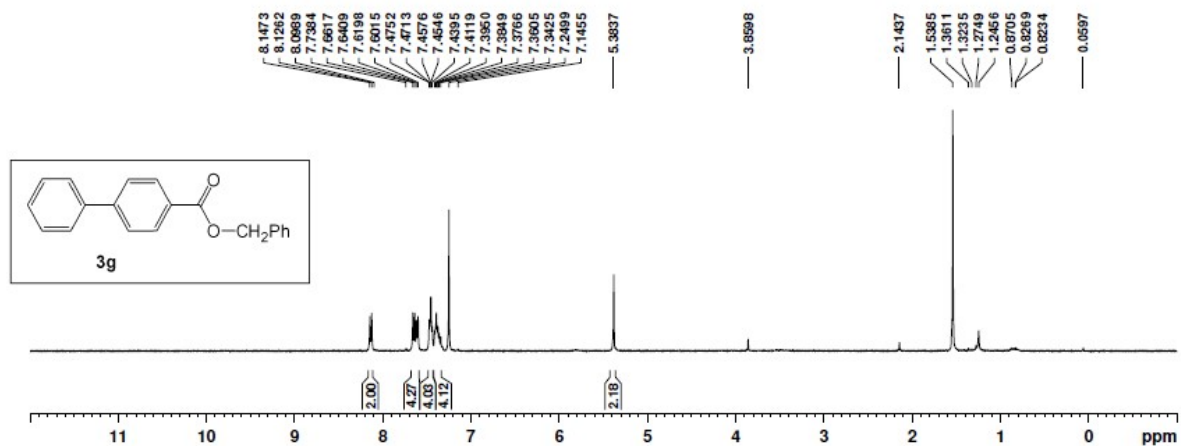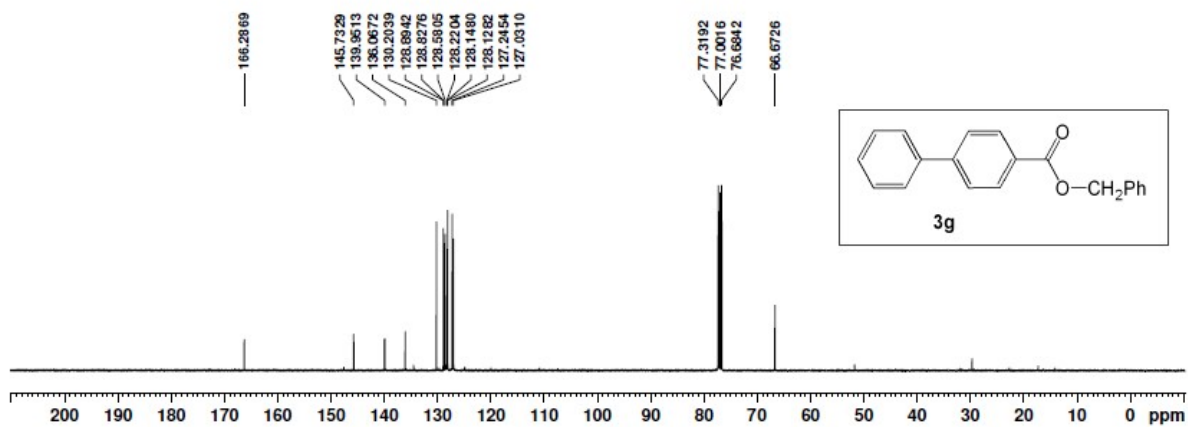

# $^1\text{H}$ & $^{13}\text{C}$ NMR spectra of 3h

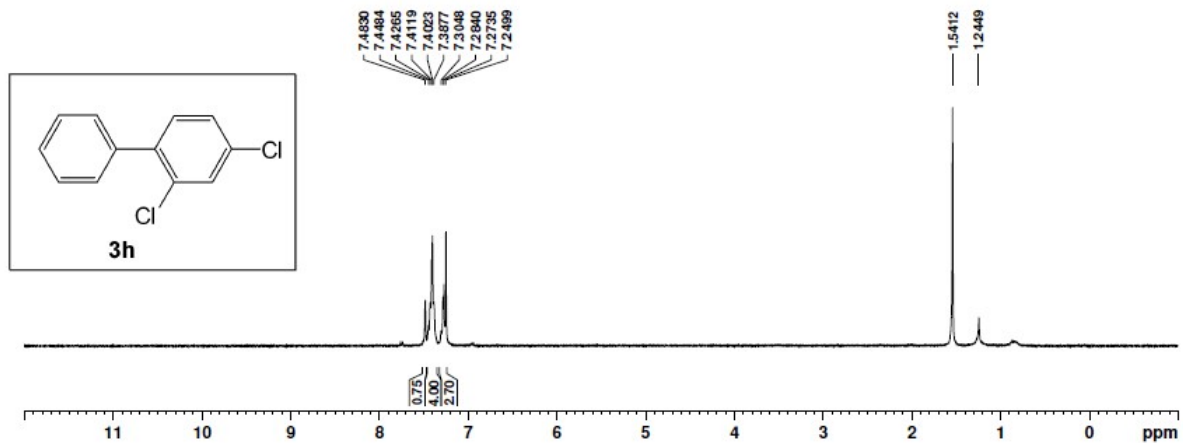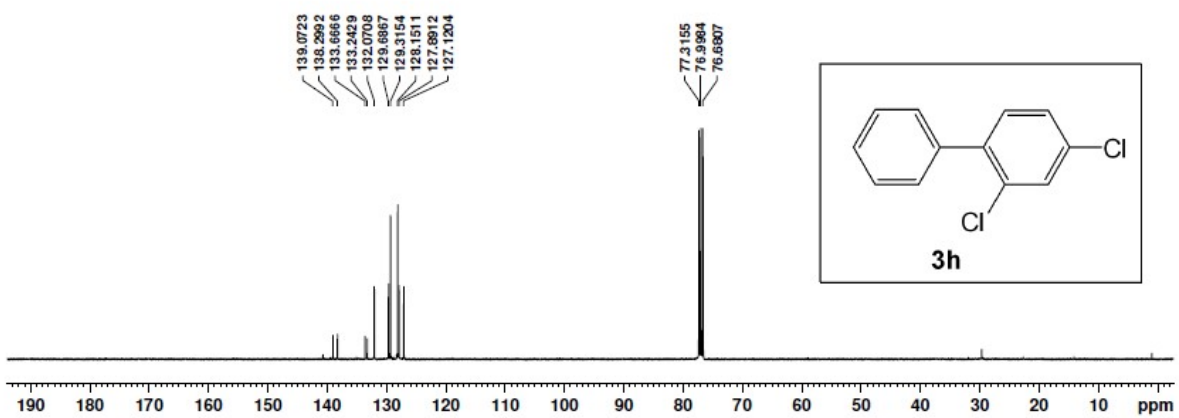

### <sup>1</sup>H NMR spectra of 3i

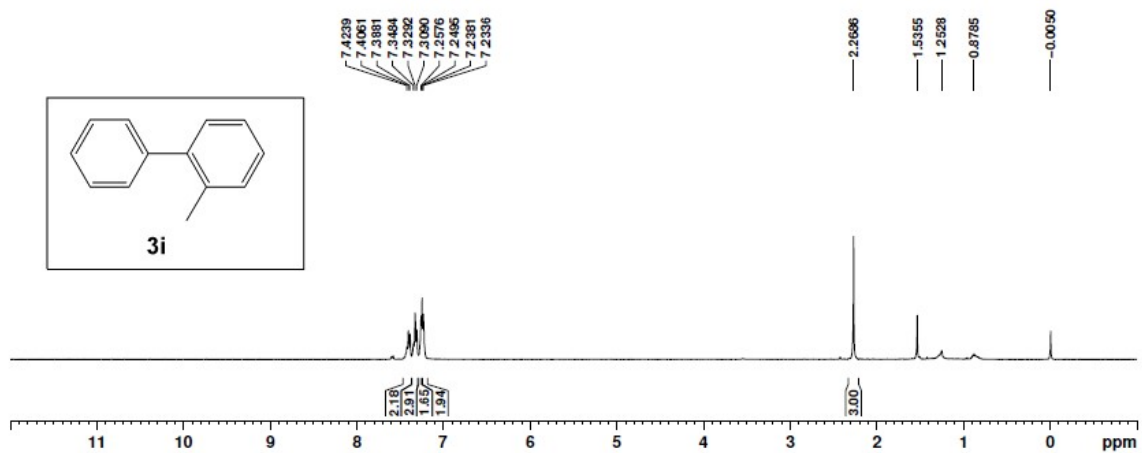

### <sup>13</sup>C NMR spectra of 3i

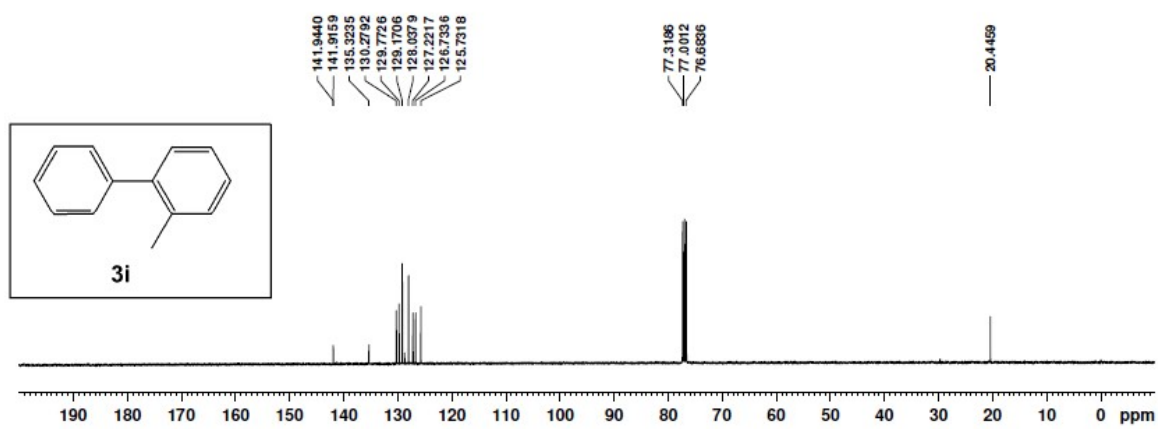



# $^1\text{H}$ & $^{13}\text{C}$ NMR spectra of 3j

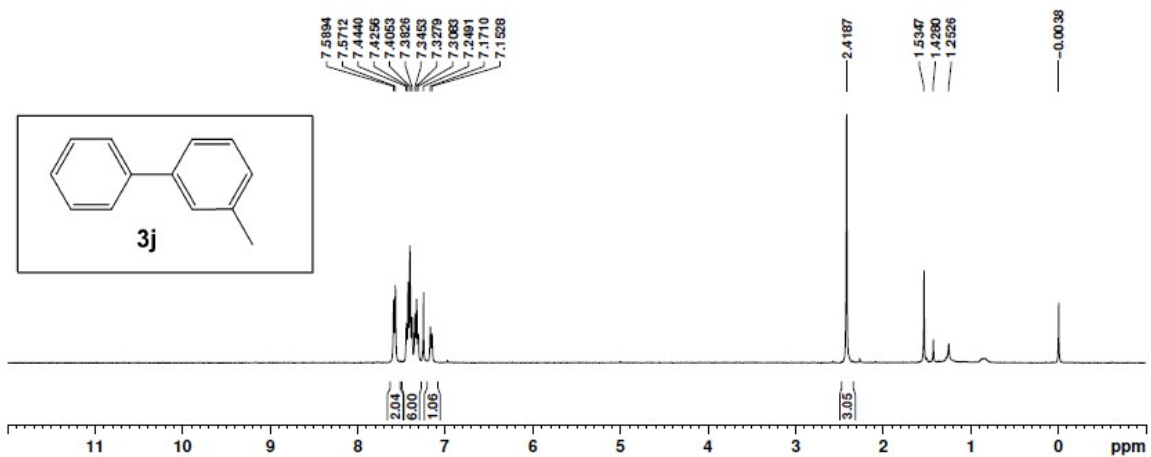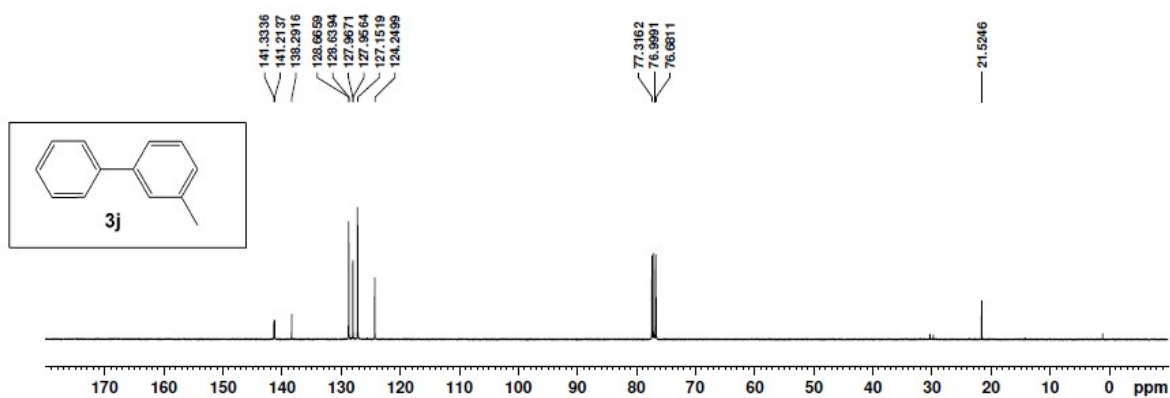

# <sup>1</sup>H & <sup>13</sup>C NMR spectra of 3k

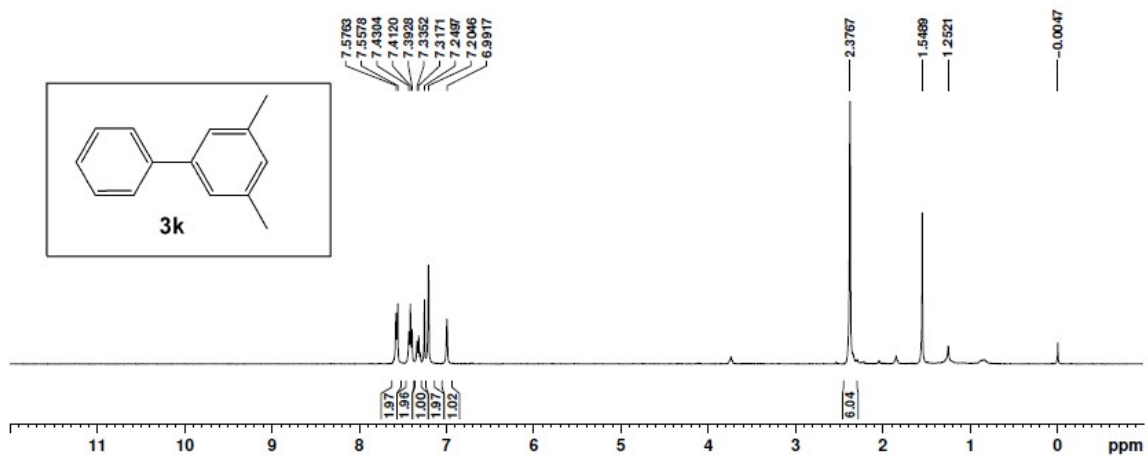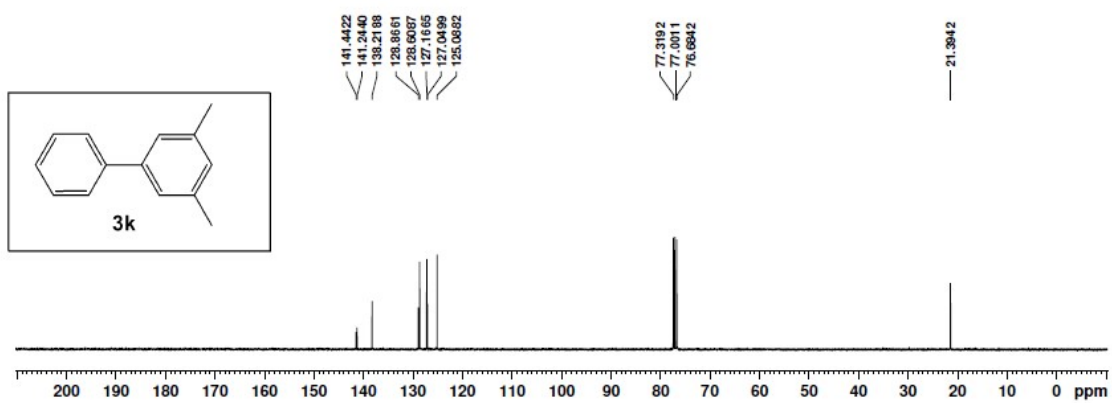

### <sup>1</sup>H NMR spectra of 3I

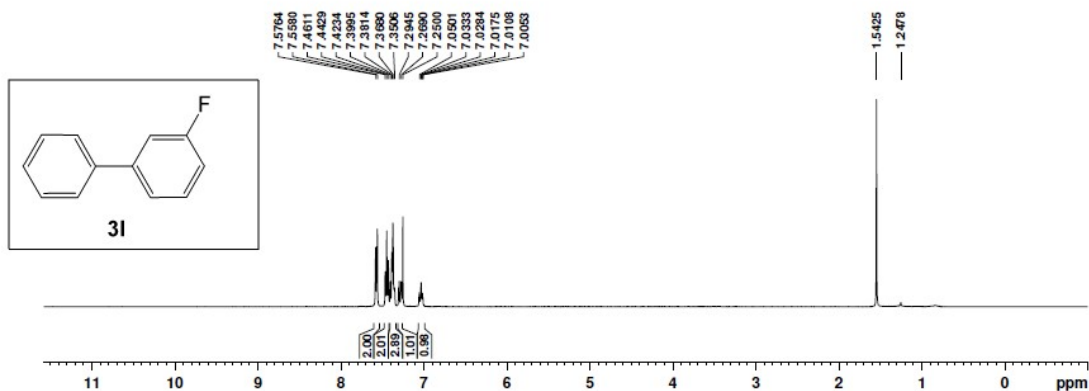

### <sup>13</sup>C & <sup>19</sup>F NMR spectra of 3I

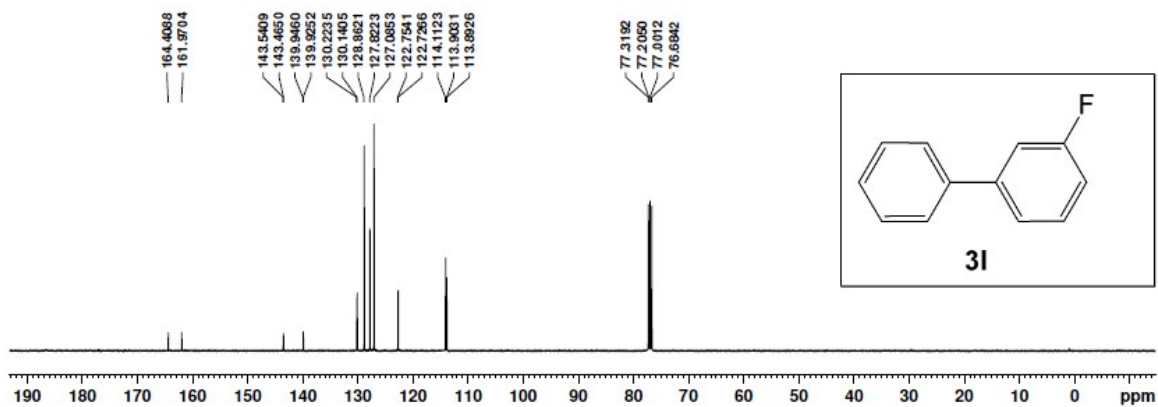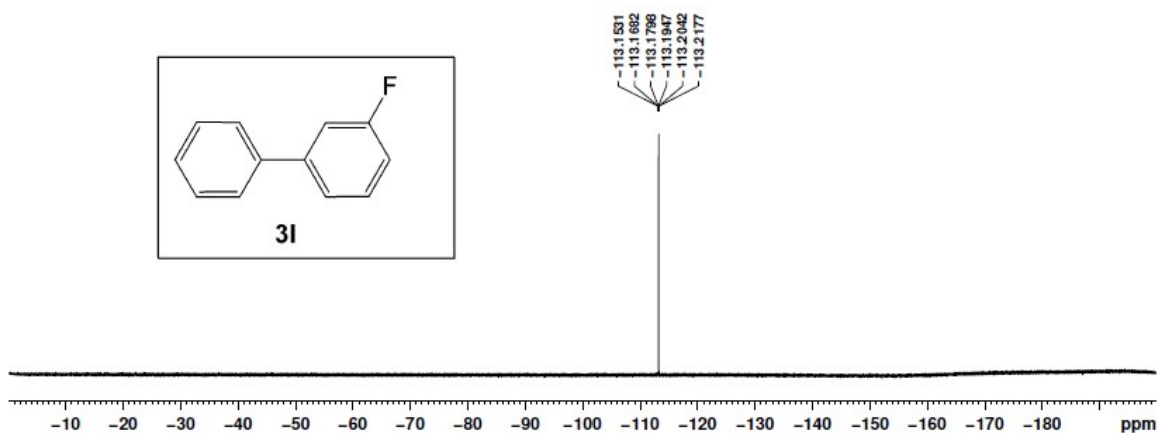

### <sup>1</sup>H NMR spectra of 3m

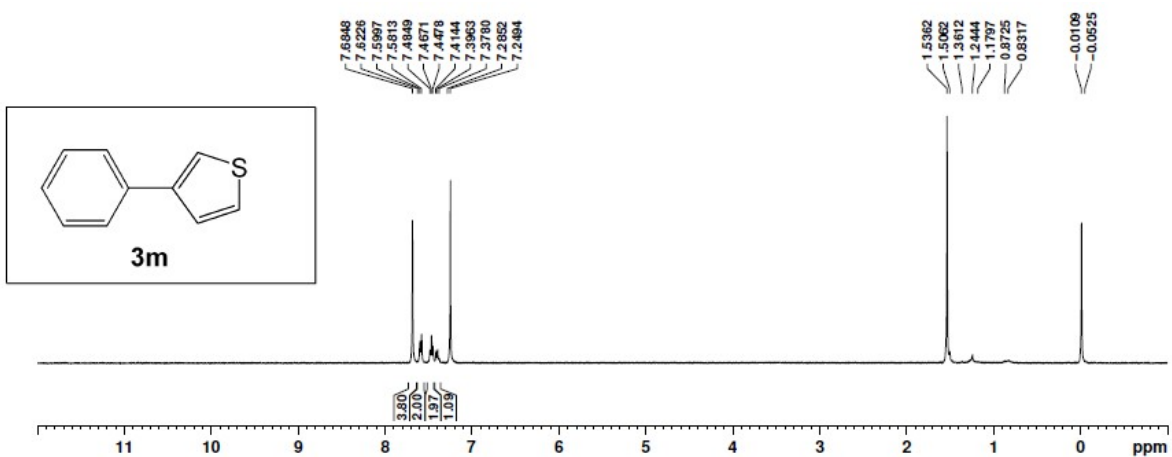

### <sup>13</sup>C NMR spectra of 3m

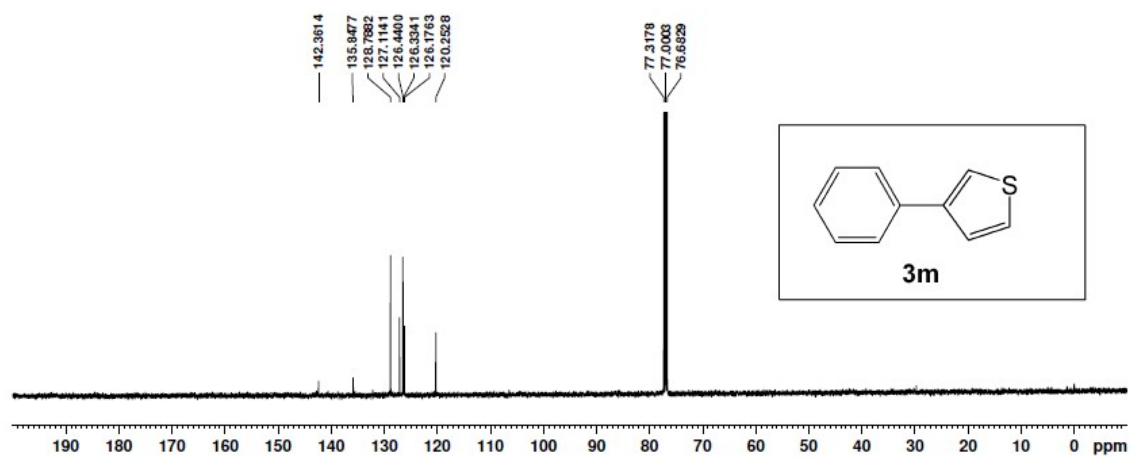

### <sup>1</sup>H NMR spectra of 3n

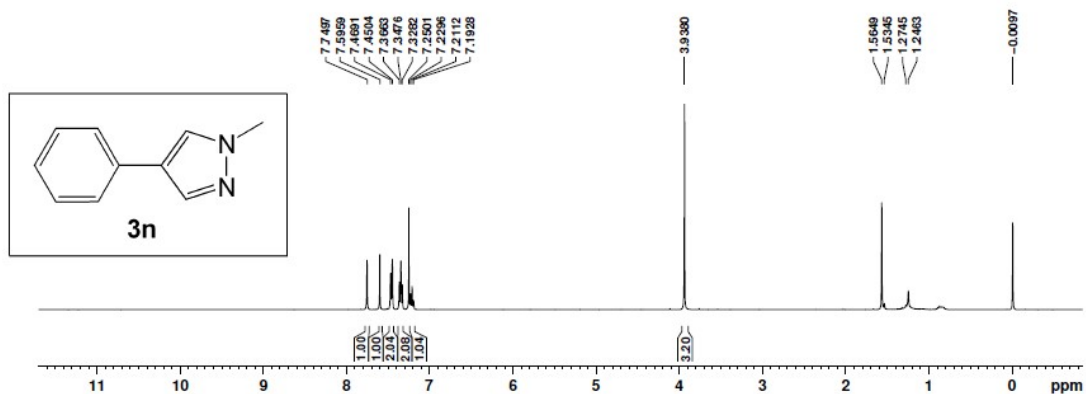

### <sup>13</sup>C NMR spectra of 3n

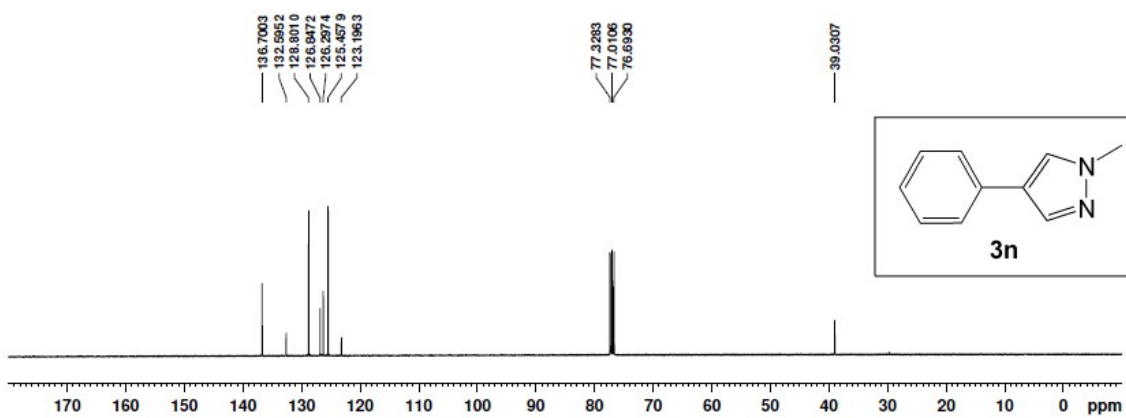

# <sup>1</sup>H & <sup>13</sup>C NMR spectra of 3o

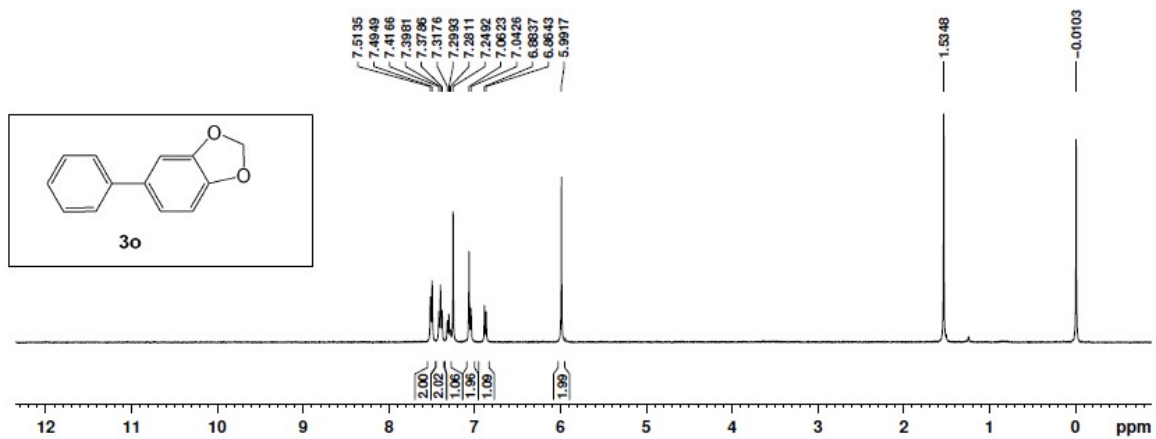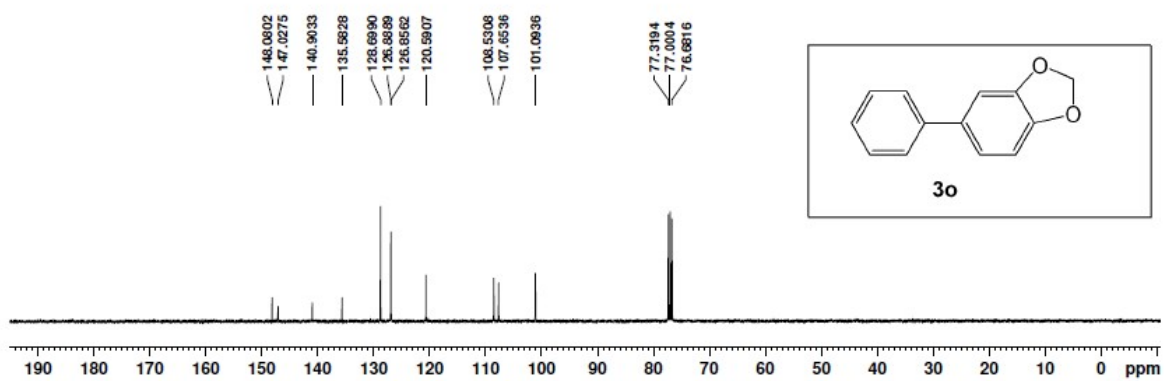

### 3: Characterization data: $^1\text{H}$ NMR & $^{13}\text{C}$ NMR Spectral data of compound 3s-t

#### $^1\text{H}$ & $^{13}\text{C}$ NMR of 3s

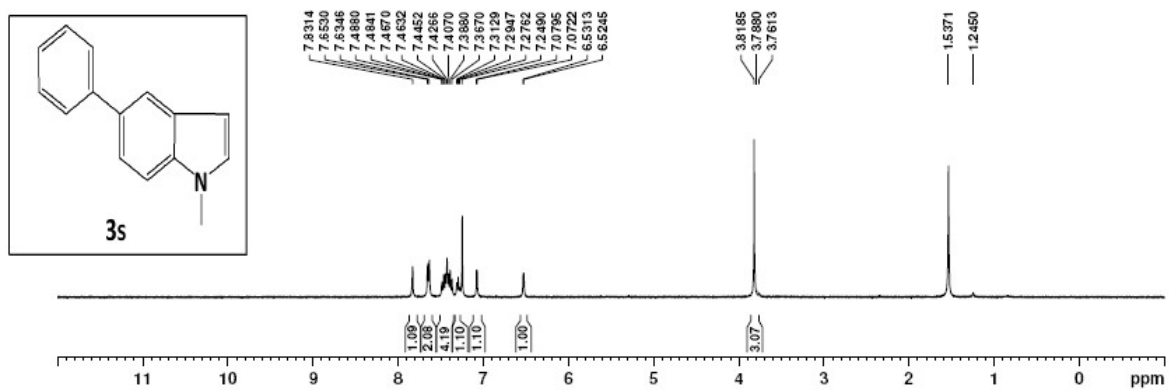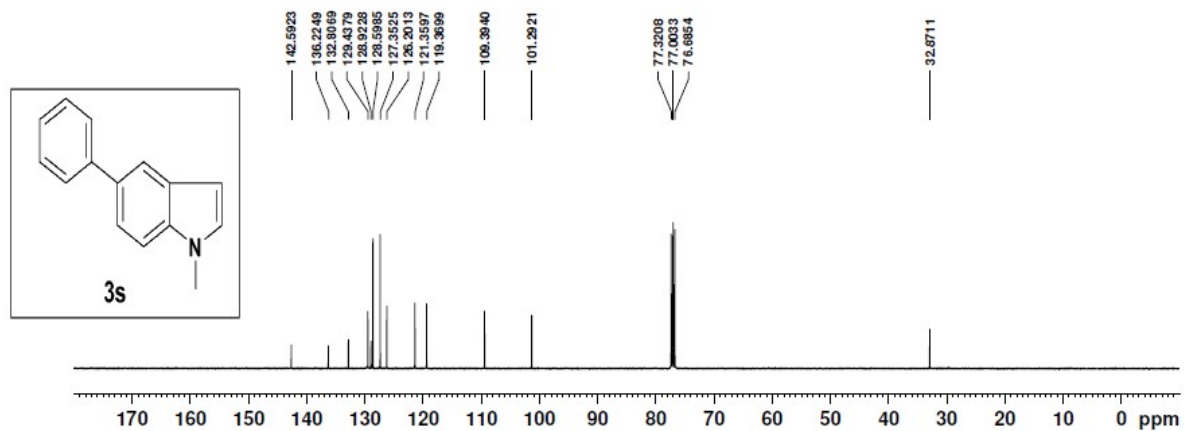

# <sup>1</sup>H & <sup>13</sup>C NMR spectra of 3t

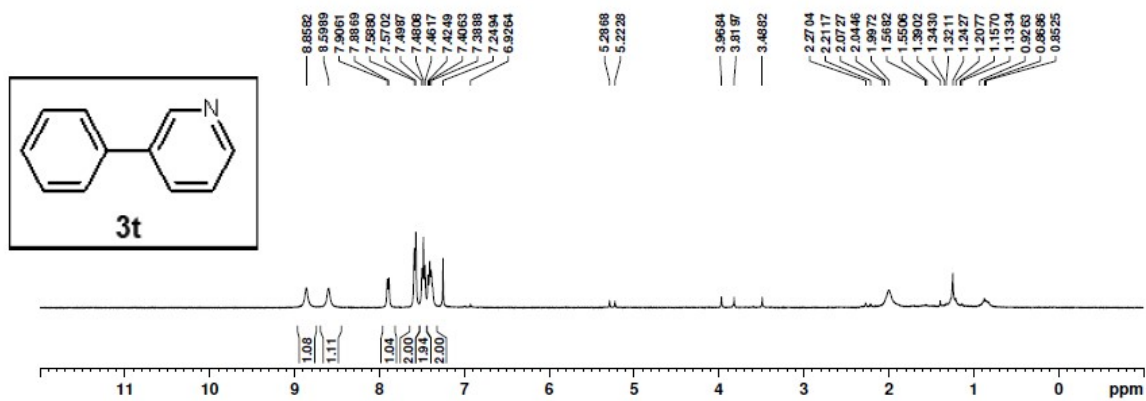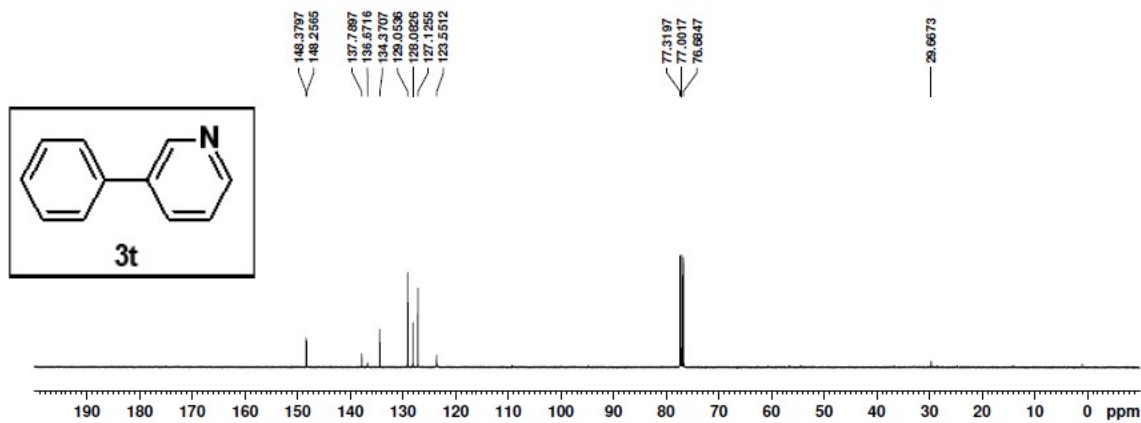



#### 4. Characterization Data: $^1\text{H}$ -NMR, $^{13}\text{C}$ NMR & $^{19}\text{F}$ NMR of compound **7a-c**

##### $^1\text{H}$ & $^{13}\text{C}$ NMR spectra of **o-7a**

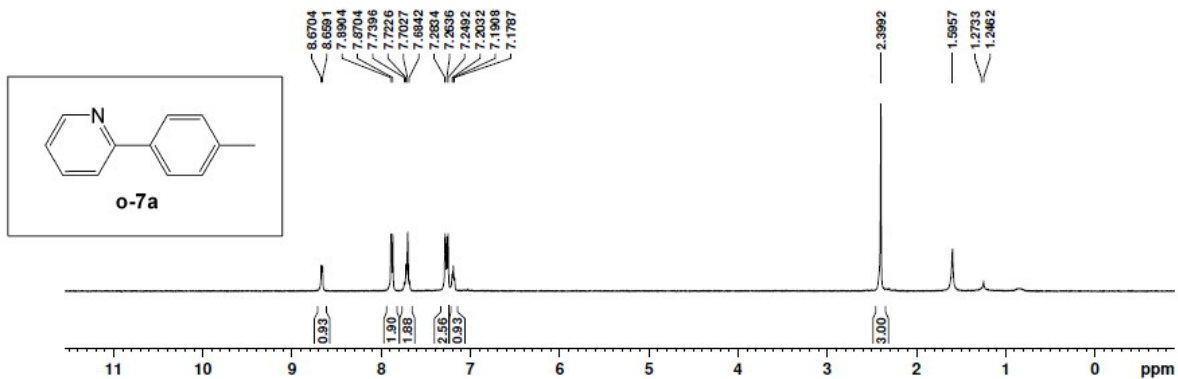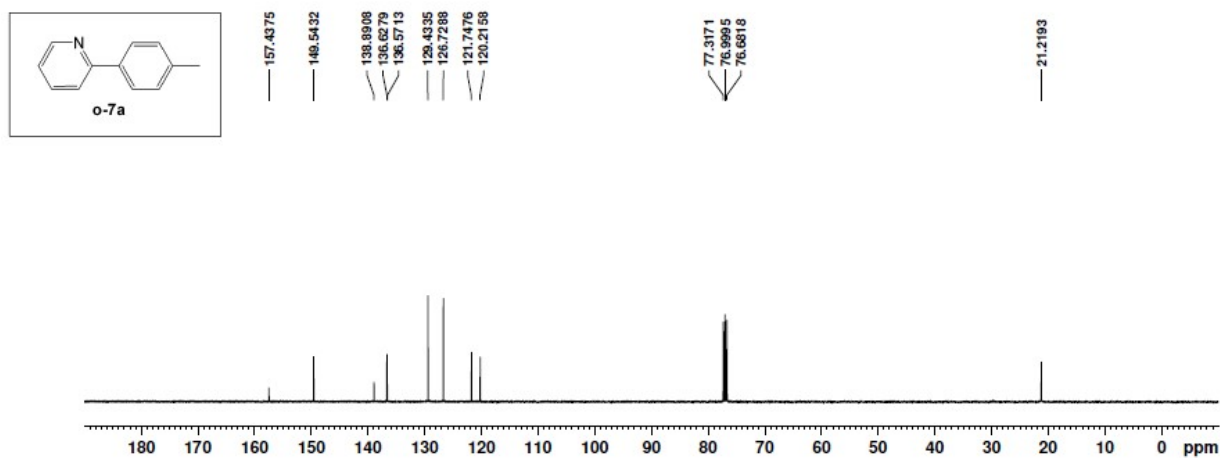

# $^1\text{H}$ & $^{13}\text{C}$ NMR spectra of m-7a

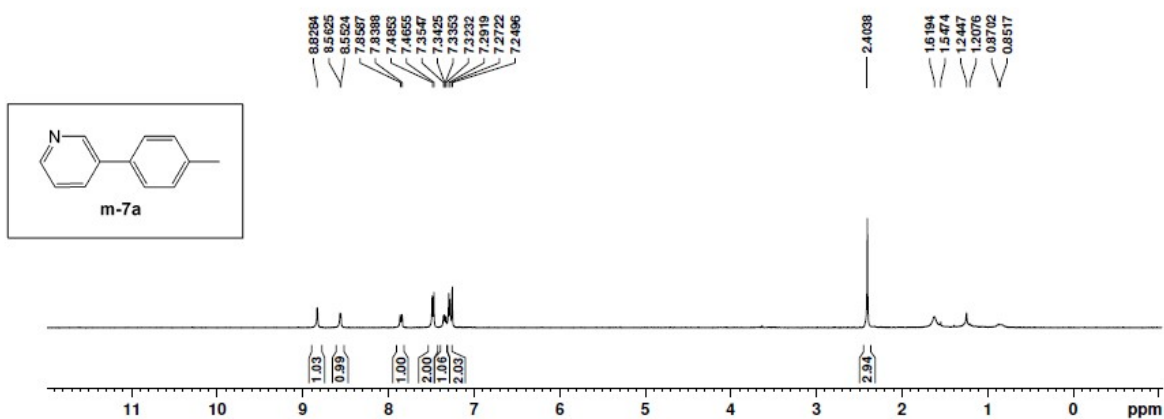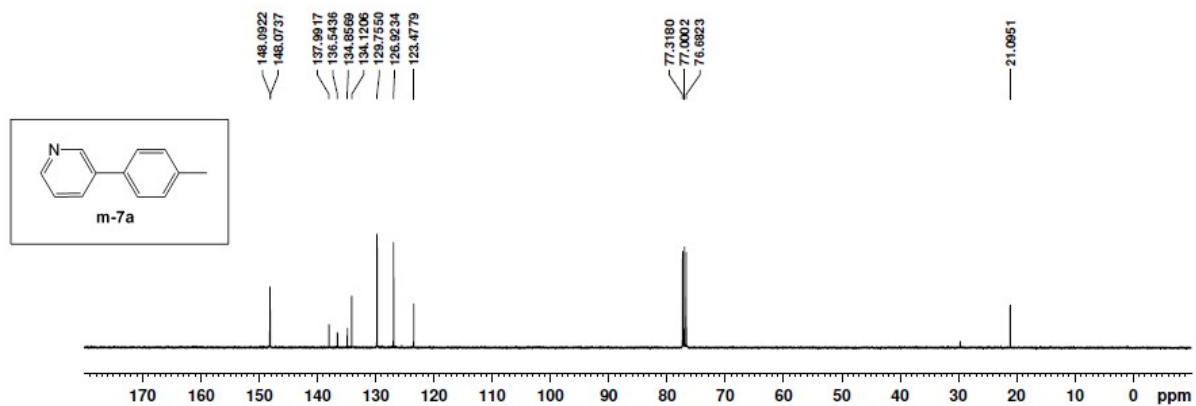

### <sup>1</sup>H NMR spectra of p-7a

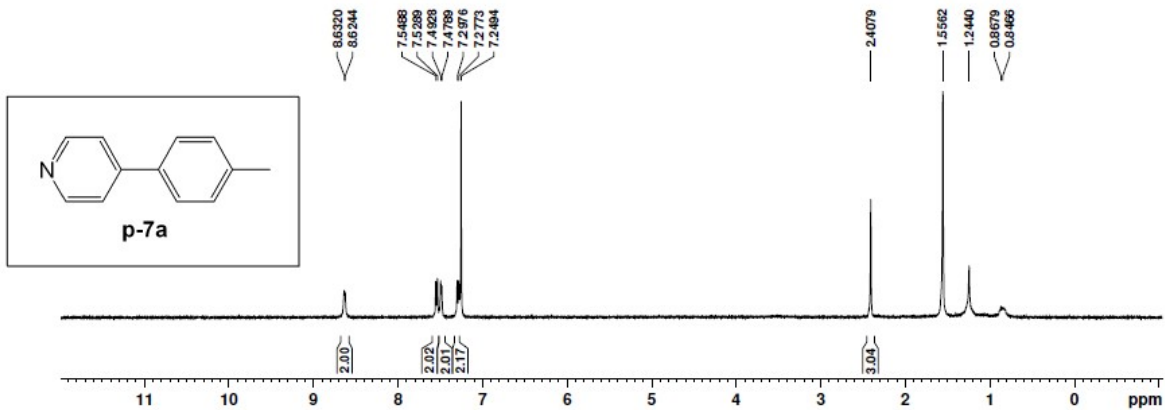

### <sup>13</sup>C NMR spectra of p-7a

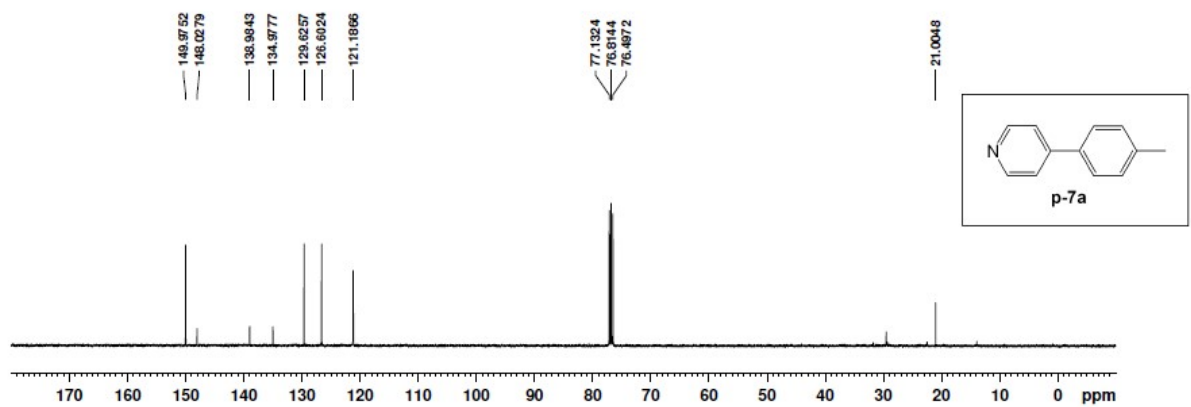

# $^1\text{H}$ & $^{13}\text{C}$ NMR spectra of o-7b

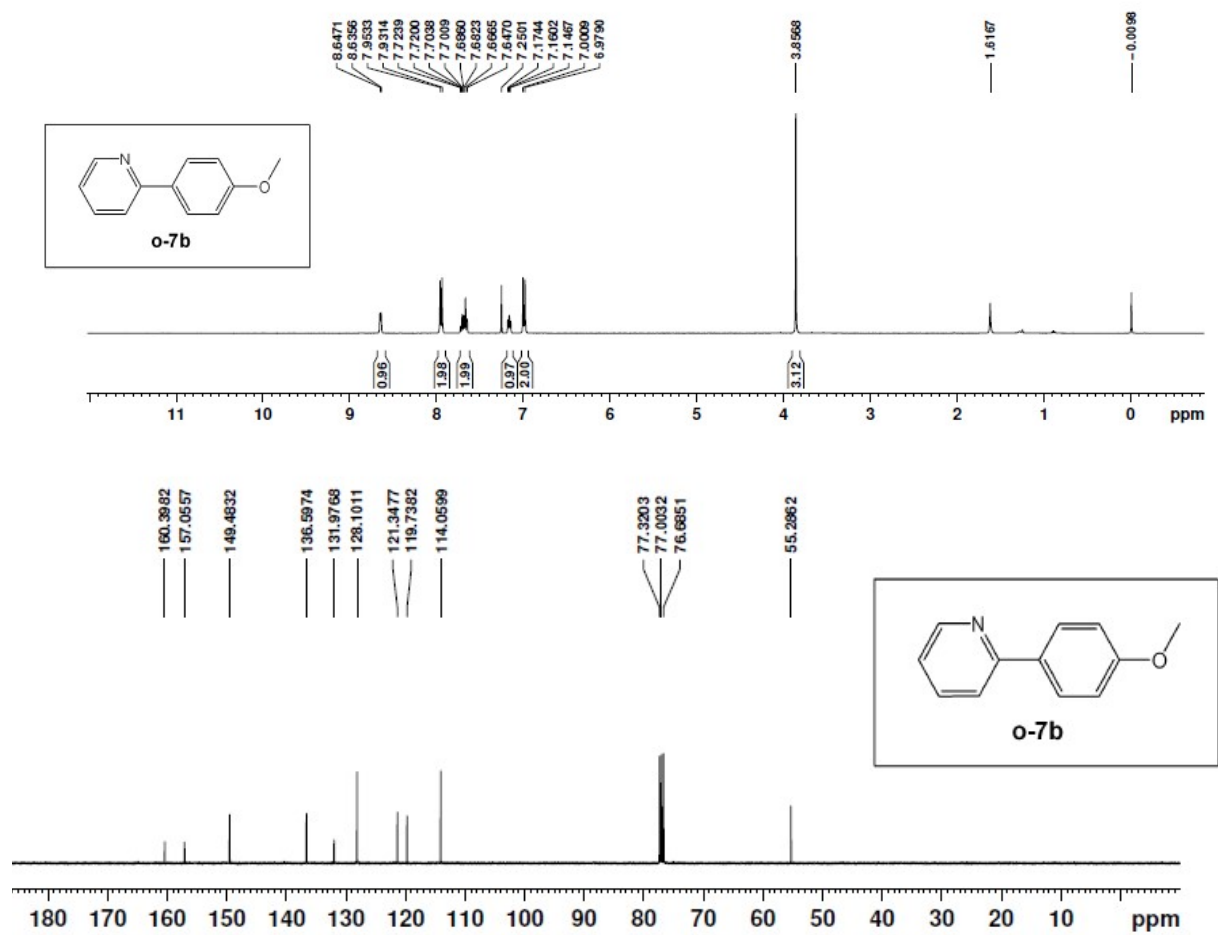

# $^1\text{H}$ & $^{13}\text{C}$ NMR spectra of m-7b

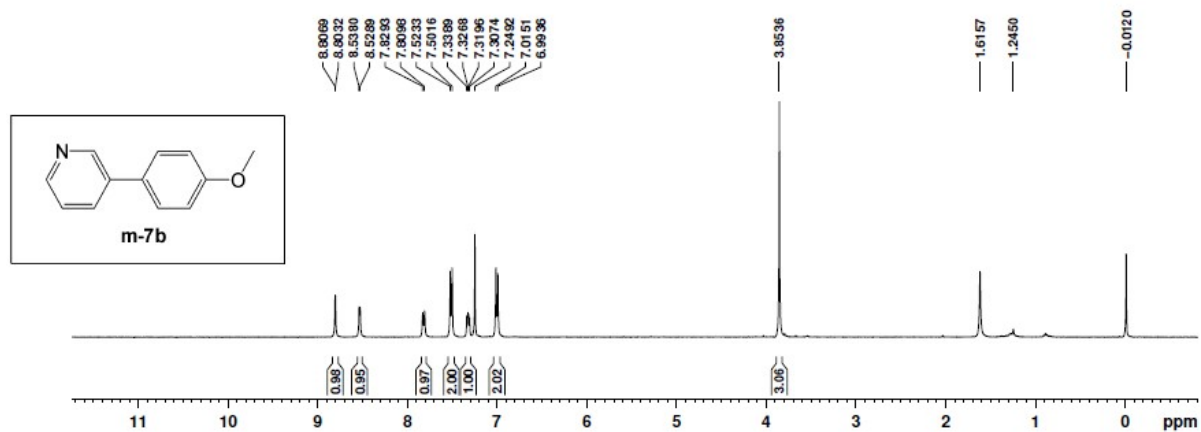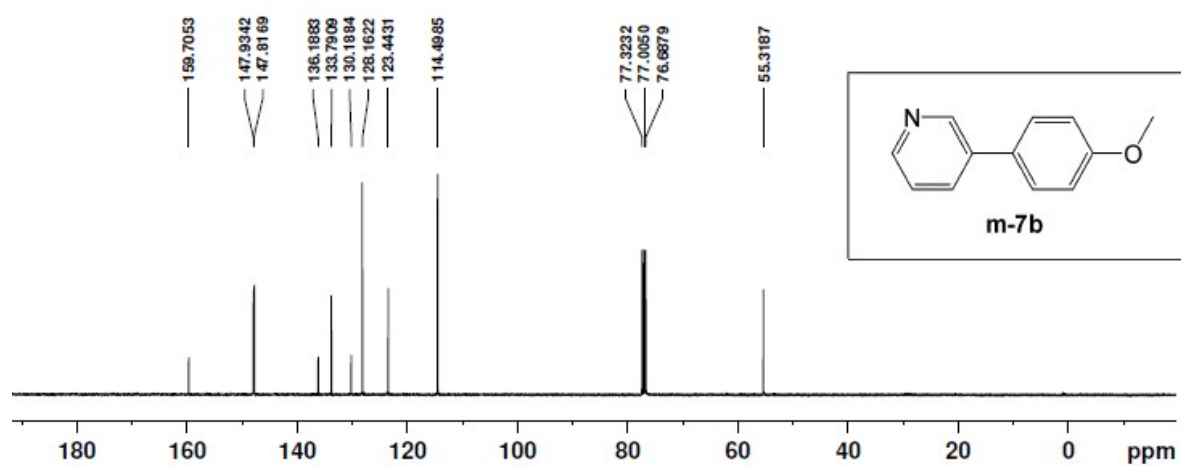

# $^1\text{H}$ & $^{13}\text{C}$ NMR spectra of p-7b

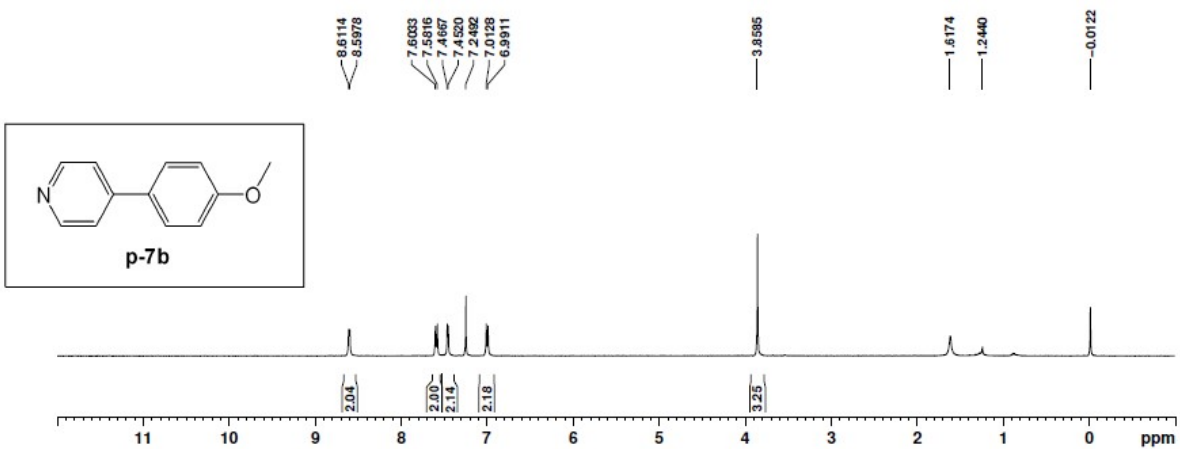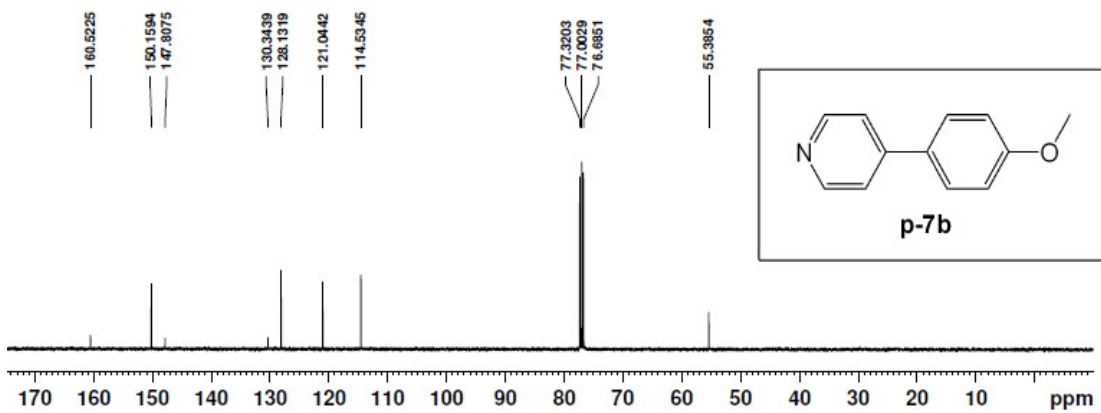

# <sup>1</sup>H & <sup>13</sup>C NMR spectra of o-7c

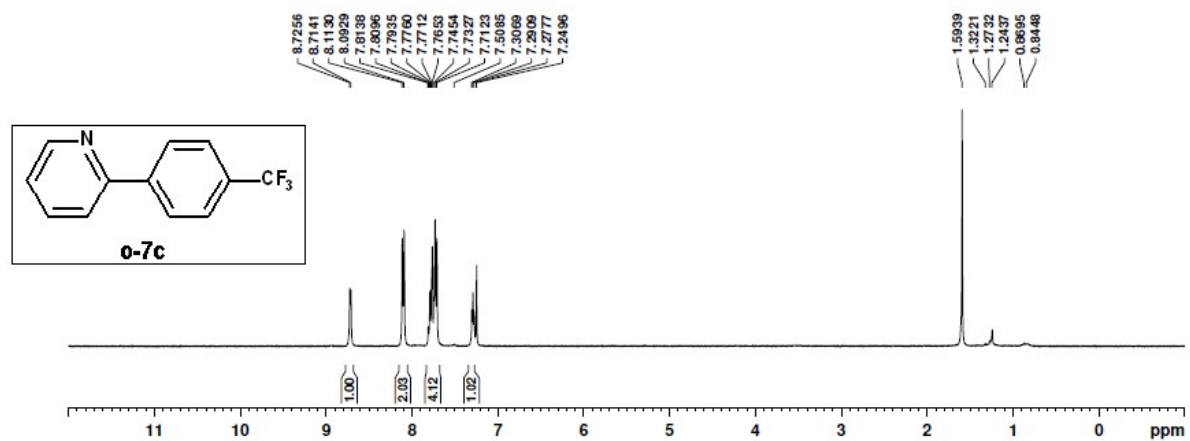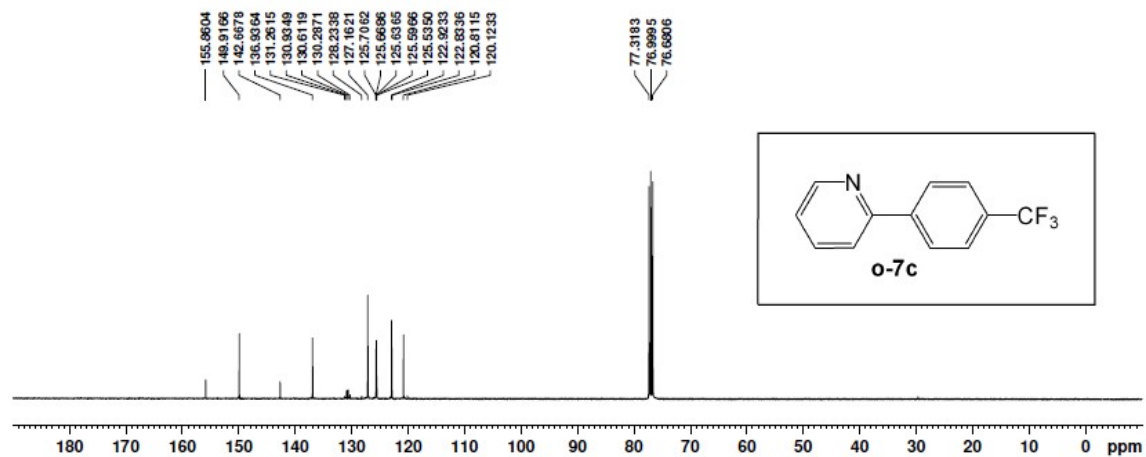

**<sup>19</sup>F NMR spectra of o-7c**

— 62.5976

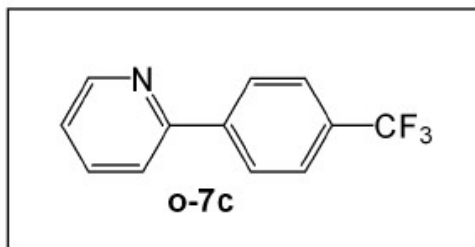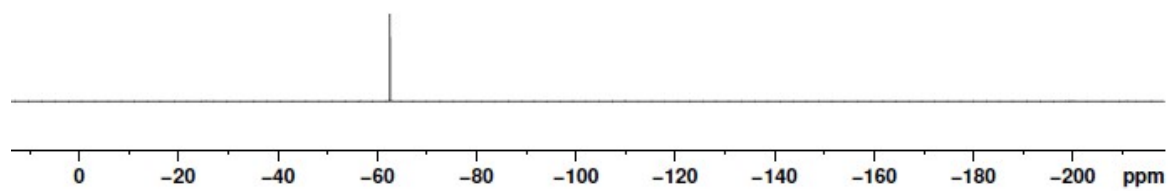



### <sup>1</sup>H NMR spectra of m-7c

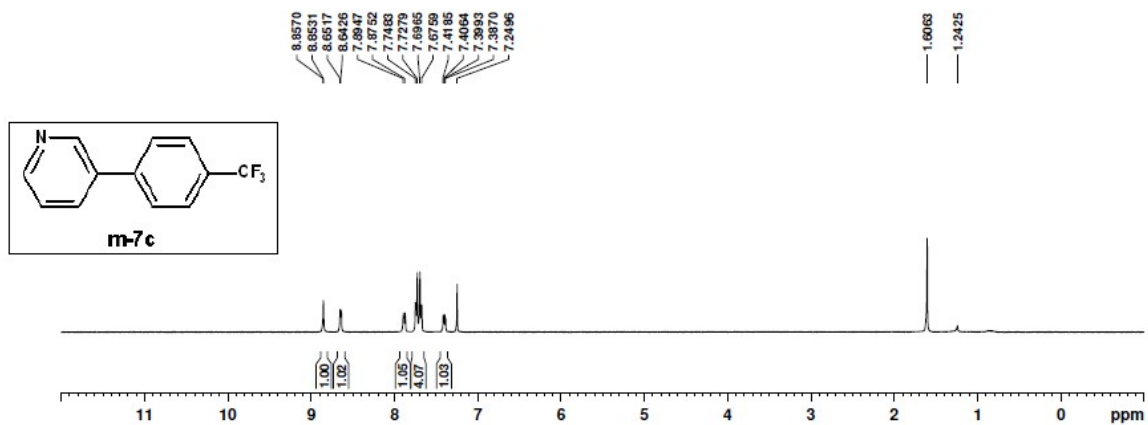

### <sup>13</sup>C NMR spectra of m-7c

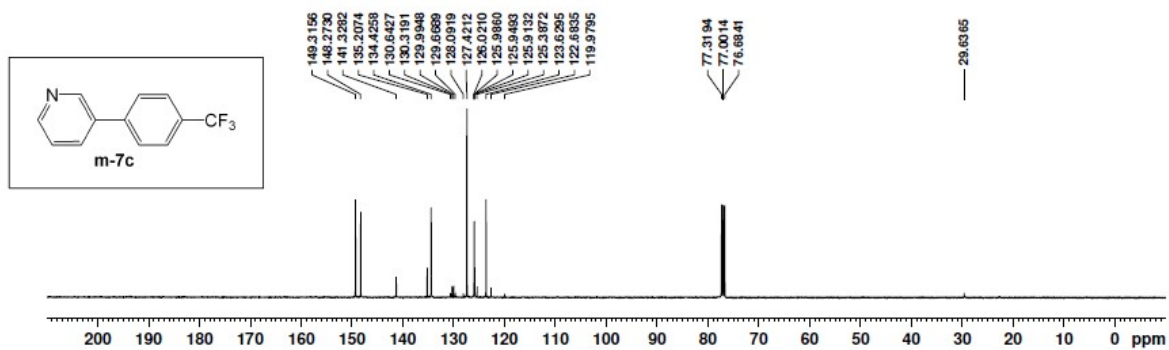

# $^1\text{H}$ & $^{13}\text{C}$ NMR spectra of p-7c

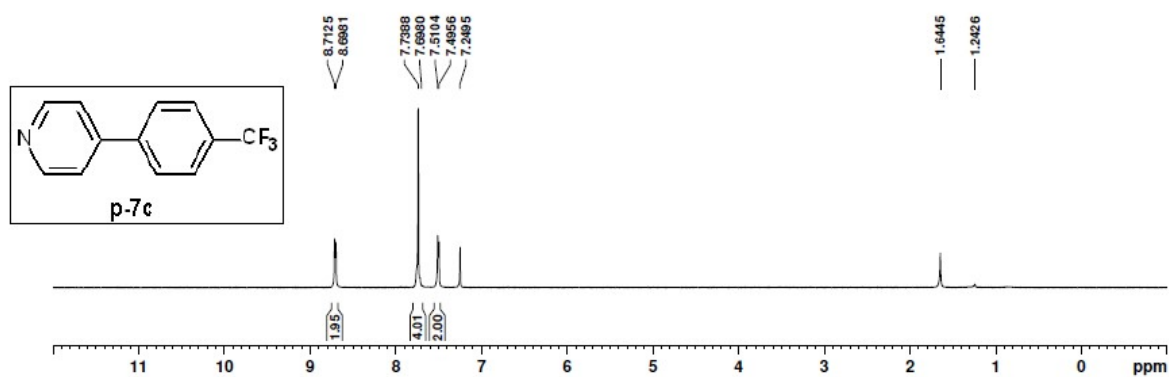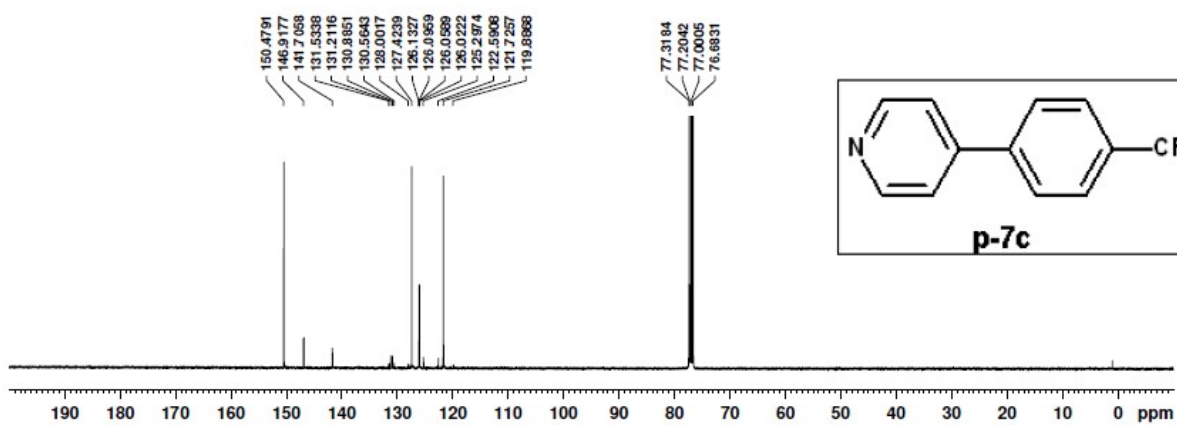

## 5. Characterization data: $^1\text{H}$ NMR & $^{13}\text{C}$ NMR spectral data of compound **3p-q**, **1r**, **3r**

### $^1\text{H}$ & $^{13}\text{C}$ NMR spectra of **3p**

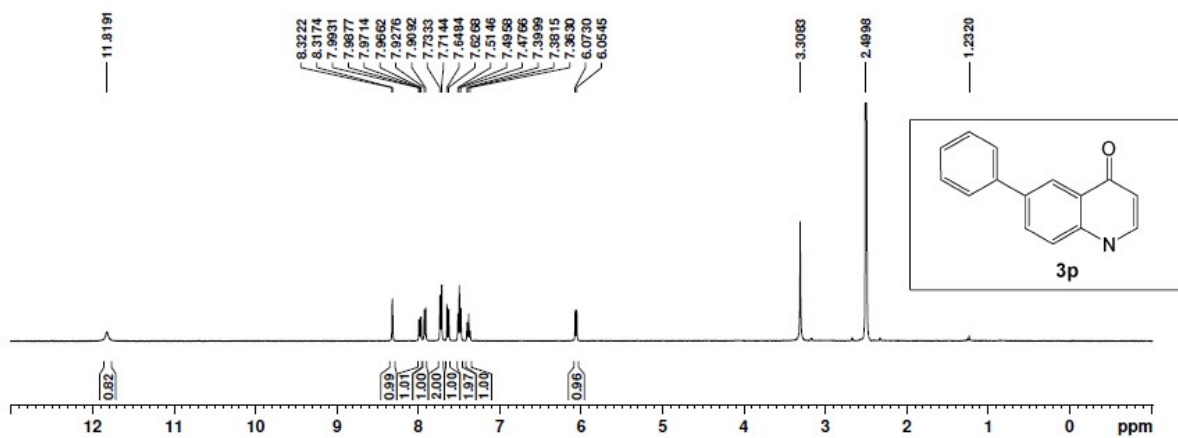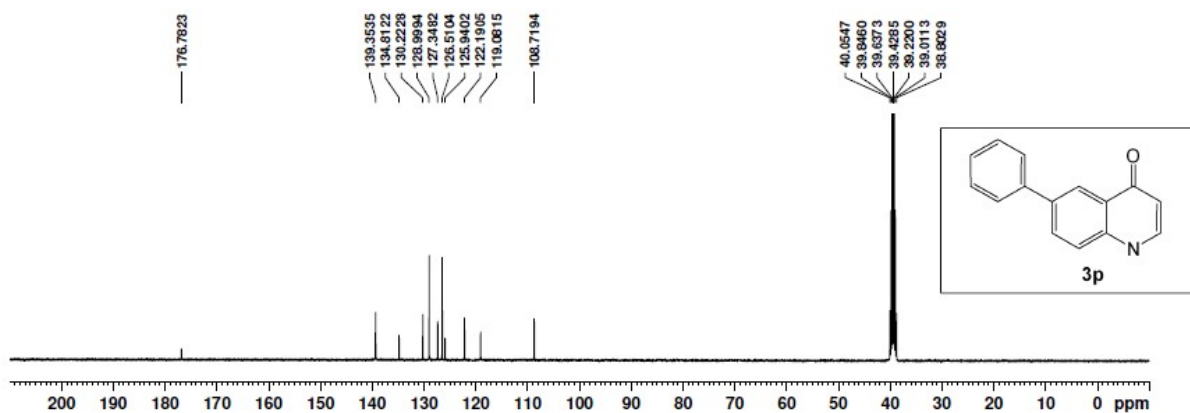

# <sup>1</sup>H & <sup>13</sup>C NMR spectra of 3q

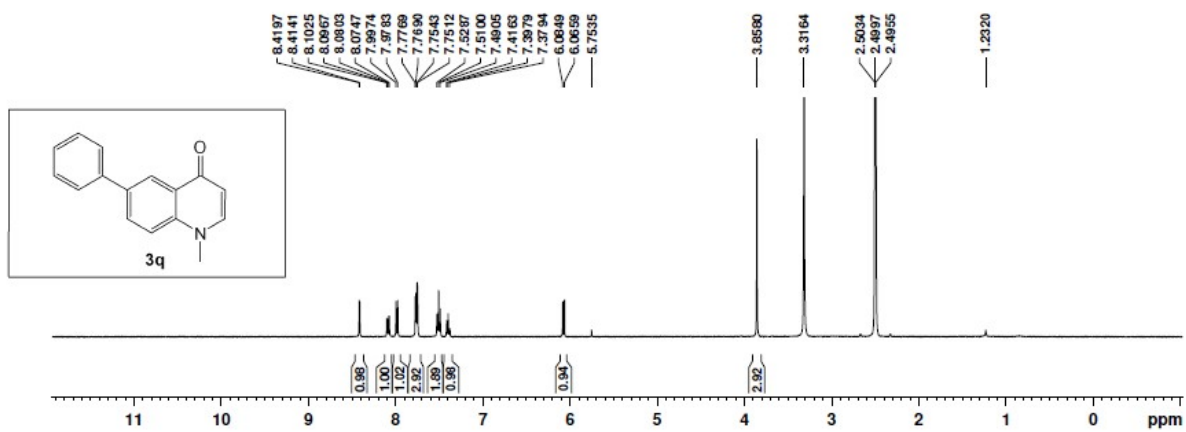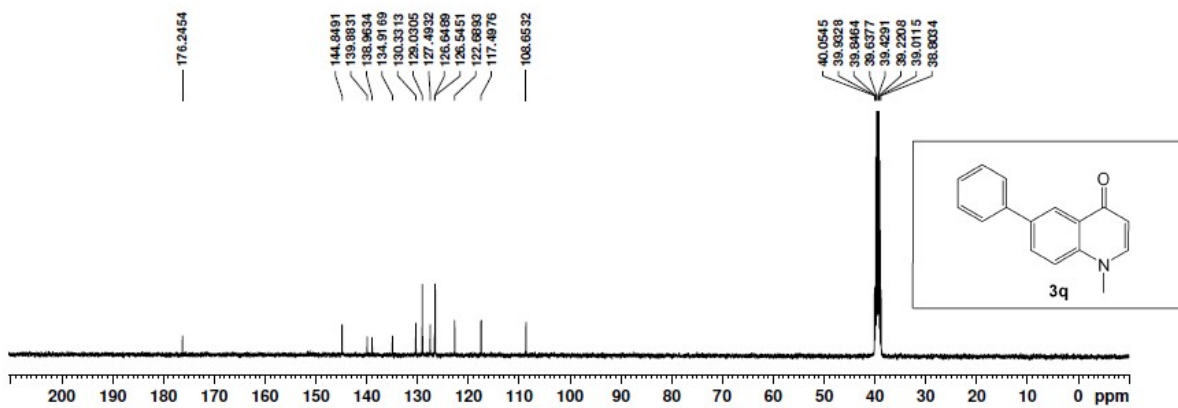

### <sup>1</sup>H NMR spectra of 1r

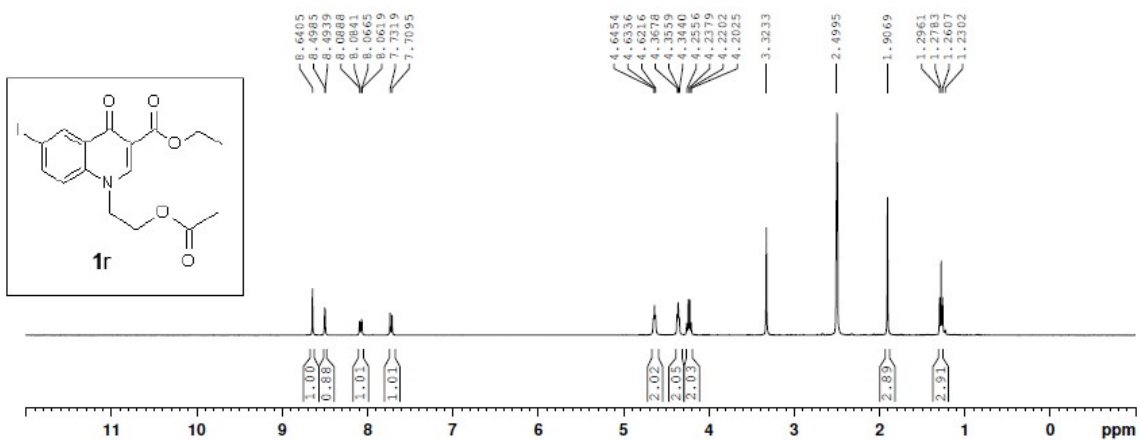

### <sup>13</sup>C NMR spectra of 1r

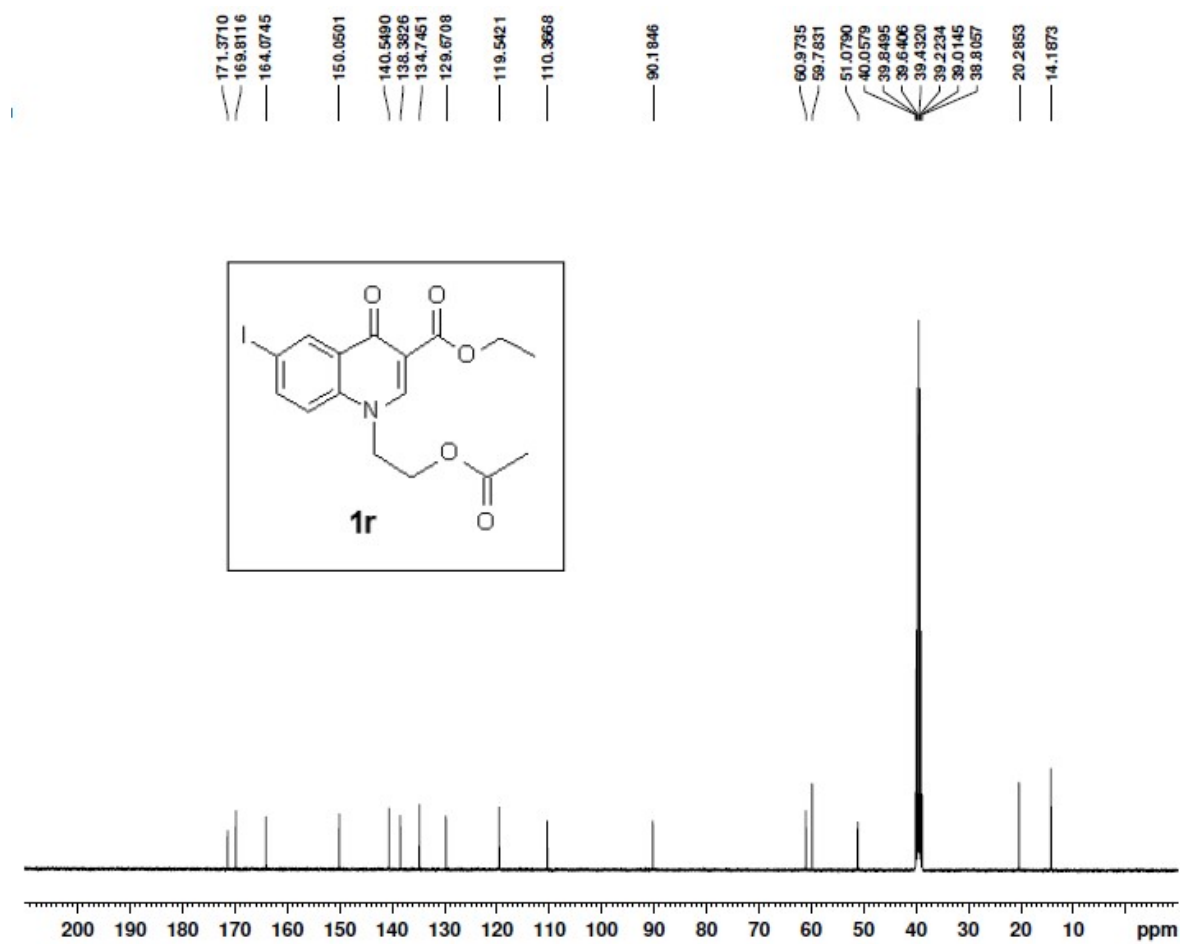

### <sup>1</sup>H NMR spectra of 3r

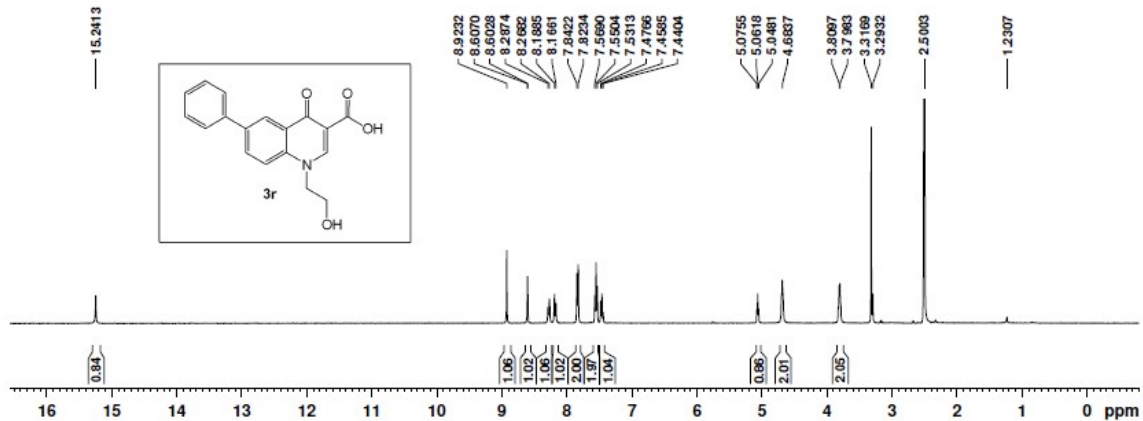

### <sup>13</sup>C NMR spectra of 3r

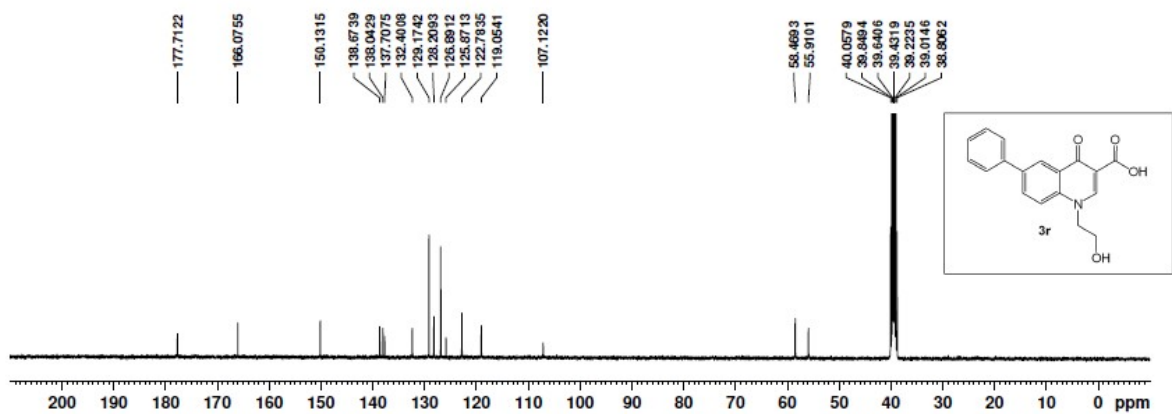

6. Characterization data:  $^1\text{H-NMR}$ ,  $^{13}\text{C NMR}$  of compound **11a-c**, **12a-b**, **13** & HMBC, HSQC data of compound **11b**

$^1\text{H NMR}$  spectra of **11a**

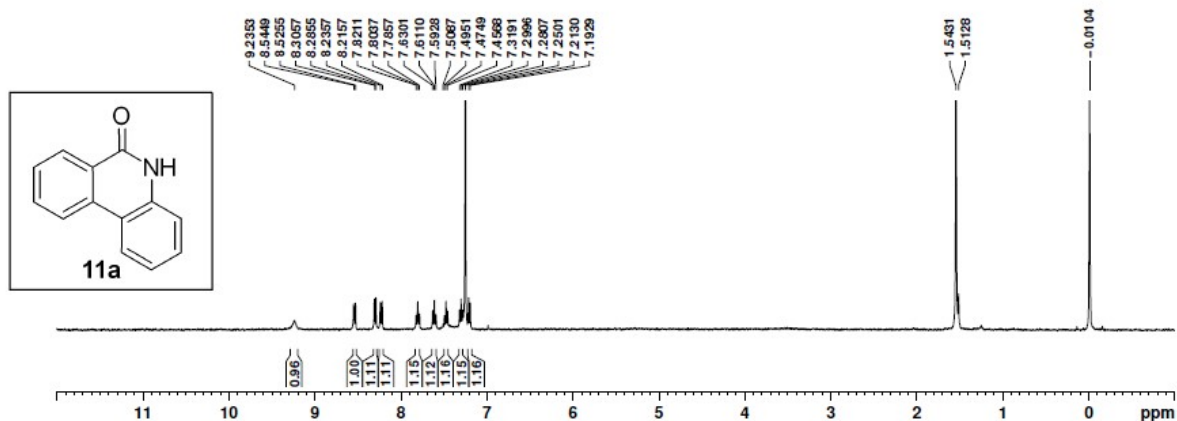

$^{13}\text{C NMR}$  spectra of **11a**

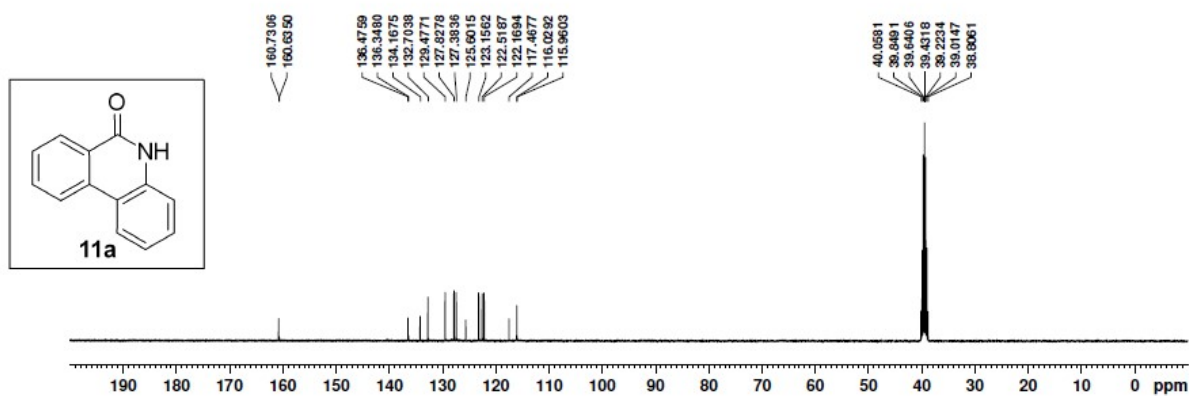

# $^1\text{H}$ & $^{13}\text{C}$ NMR spectra of 11b

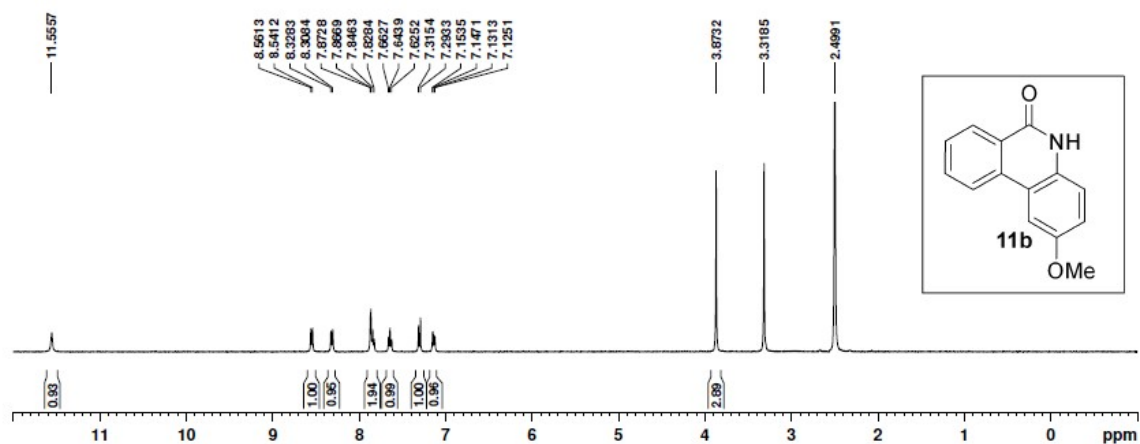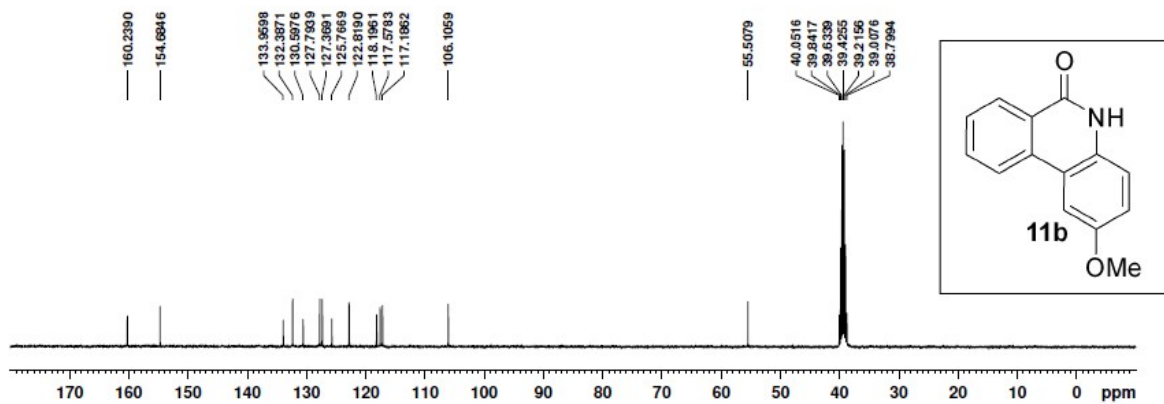



## HMBC and HSQC data of compound 11b

### HMBC data of 11b

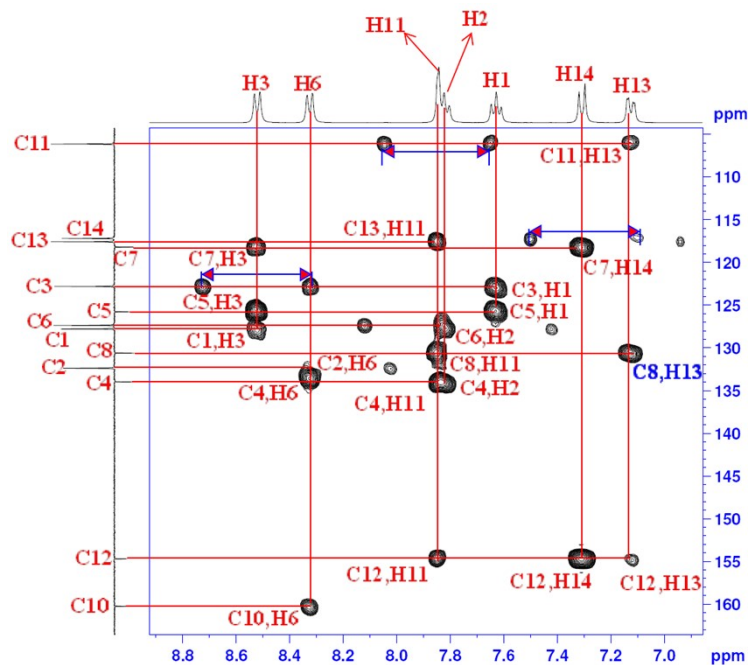

### HSQC data of 11b

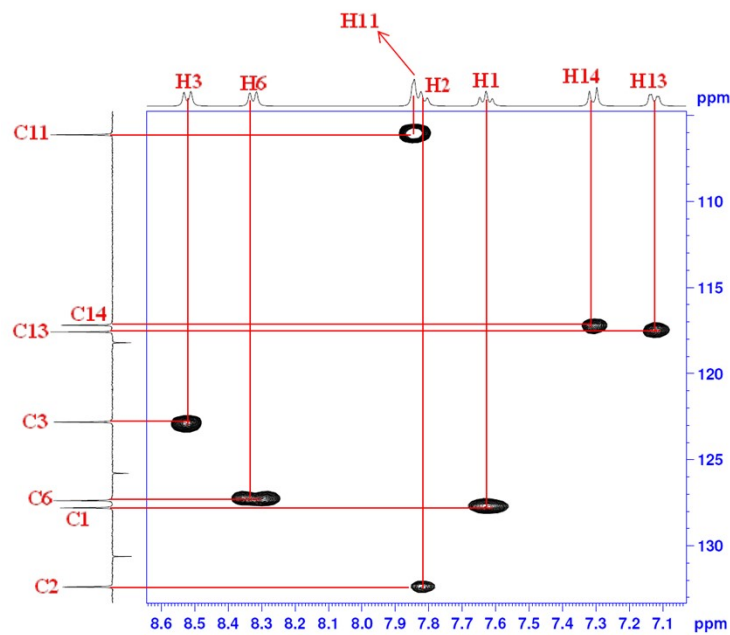

# $^1\text{H}$ & $^{13}\text{C}$ NMR spectra of 11c

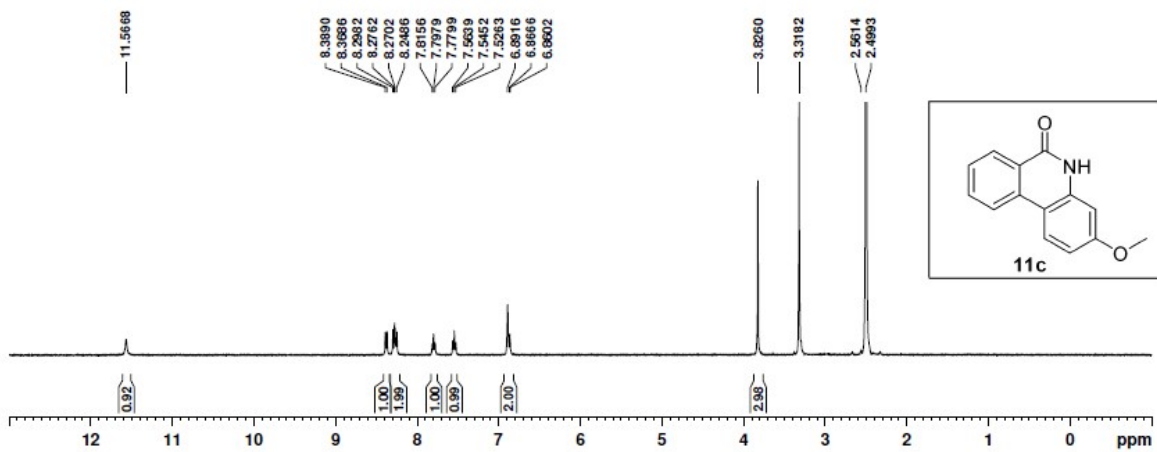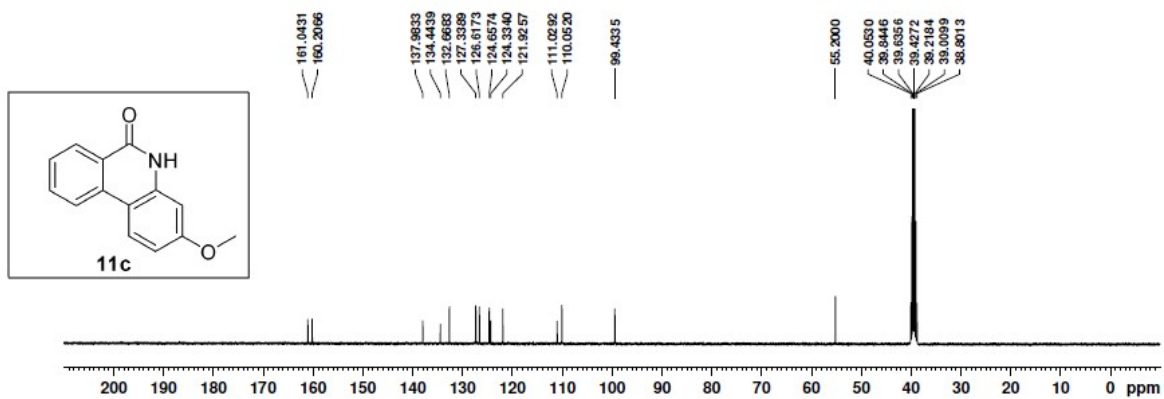

### <sup>1</sup>H NMR spectra of 12a

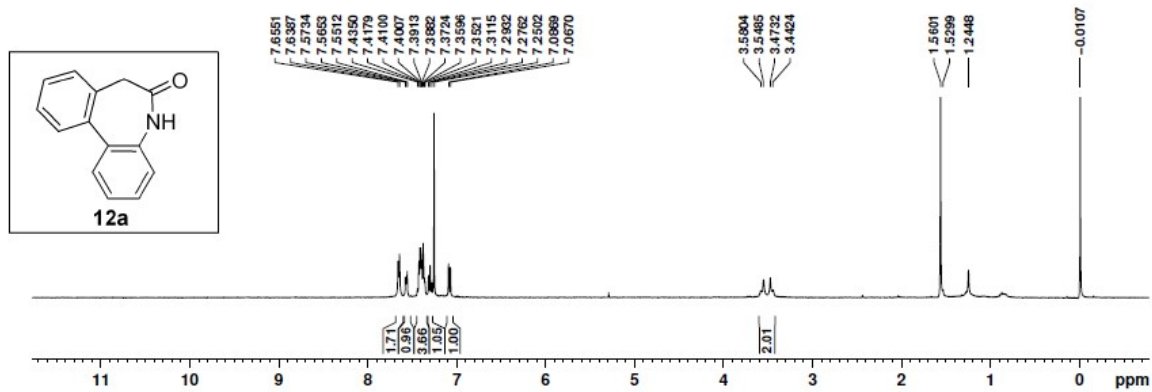

### <sup>13</sup>C NMR spectra of 12a

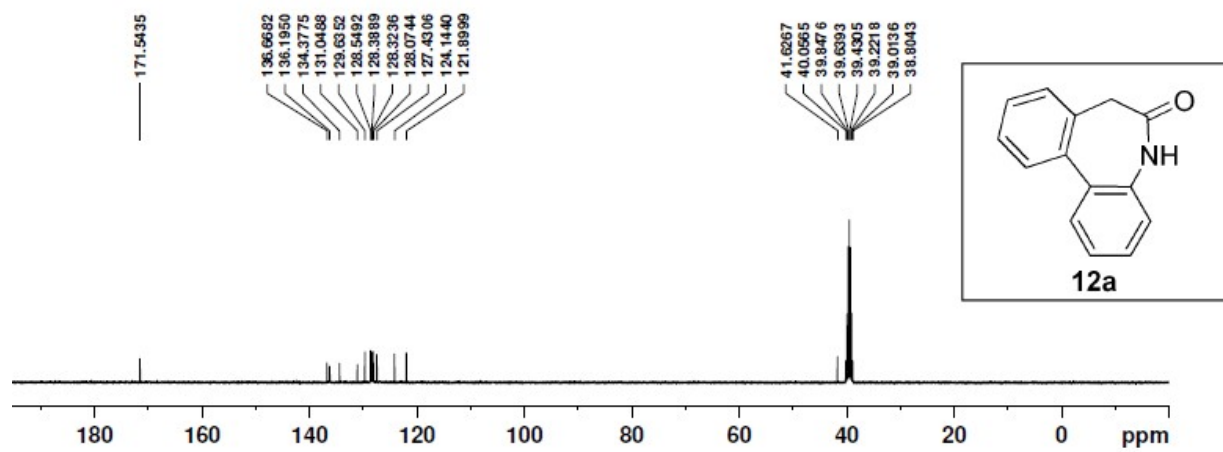

### <sup>1</sup>H NMR spectra of 12b

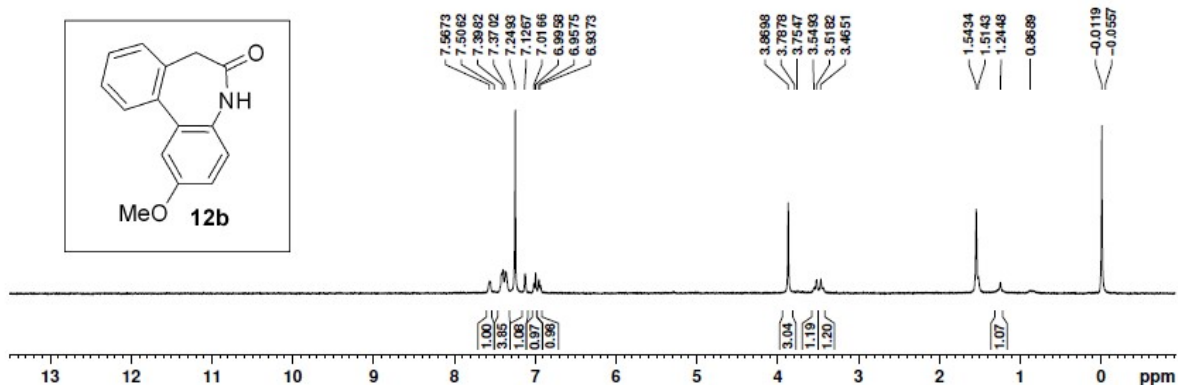

### <sup>13</sup>C NMR spectra of 12b

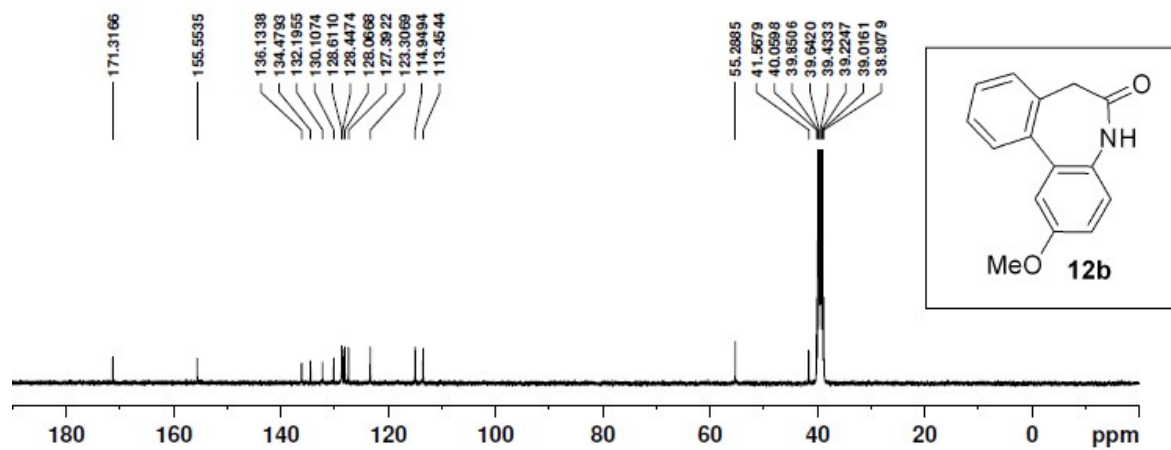

### <sup>1</sup>H NMR spectra of 13

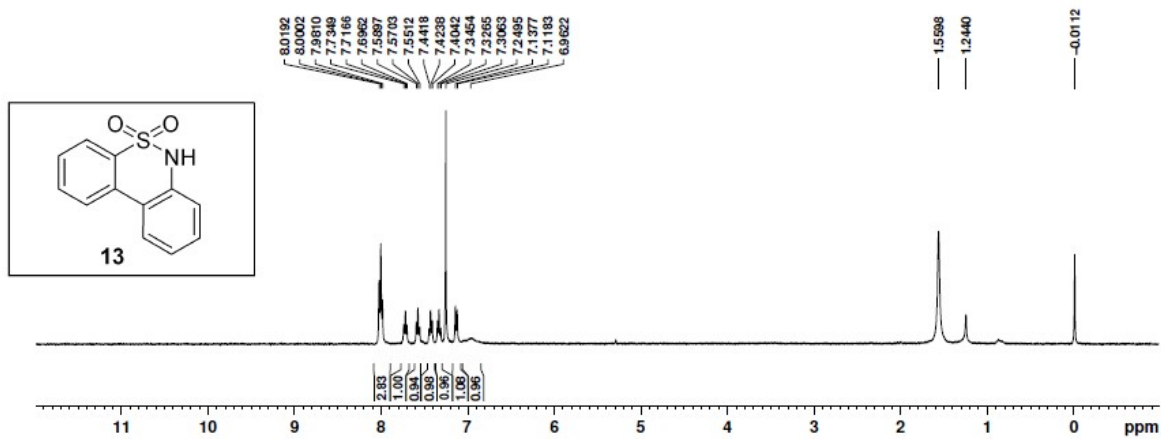

### <sup>13</sup>C NMR spectra of 13

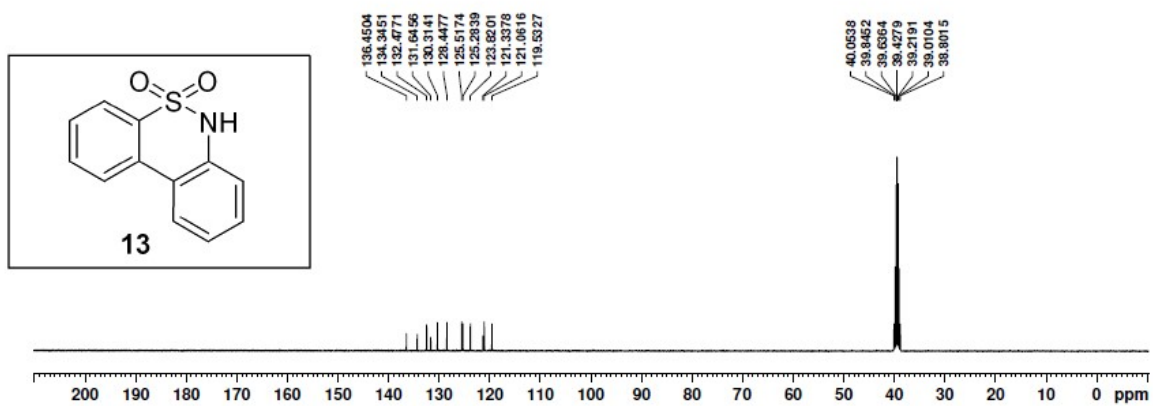

# <sup>1</sup>H NMR spectra of 3a-d<sub>5</sub>

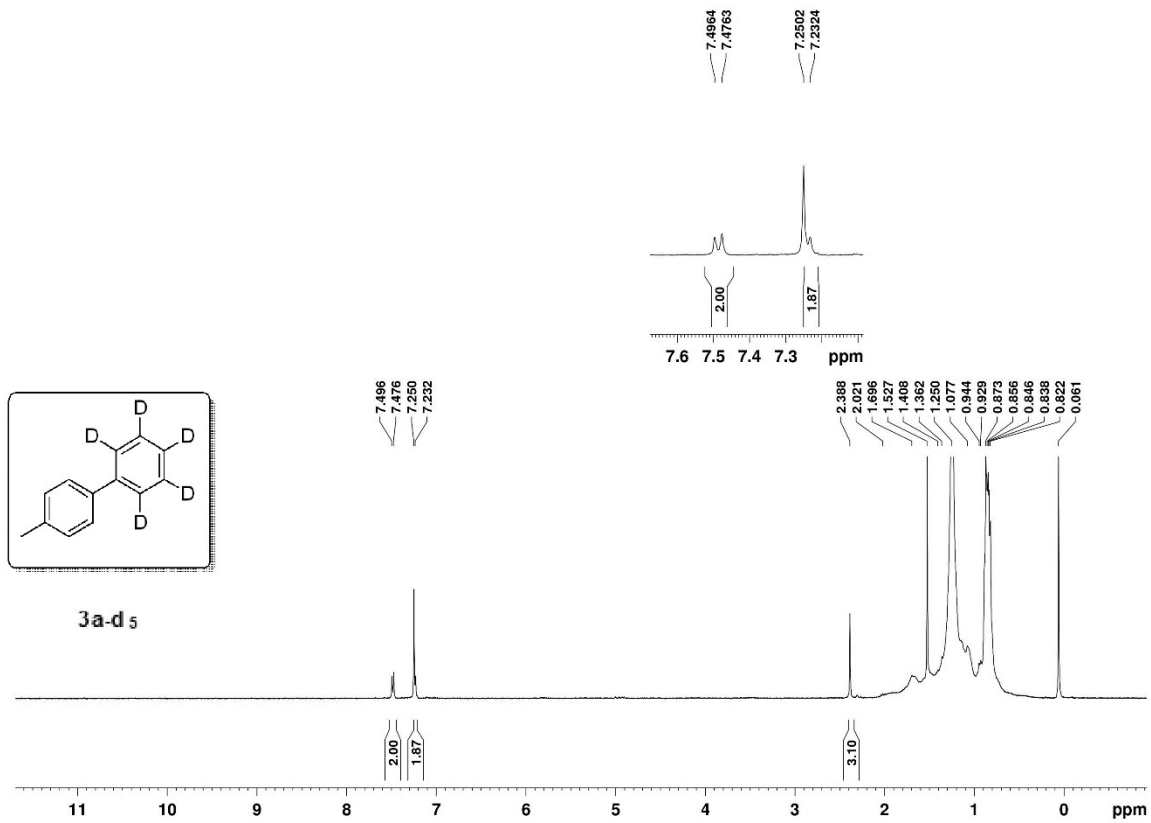

**Images of UV-light ( $\lambda < 310$  nm) irradiation set-up:**

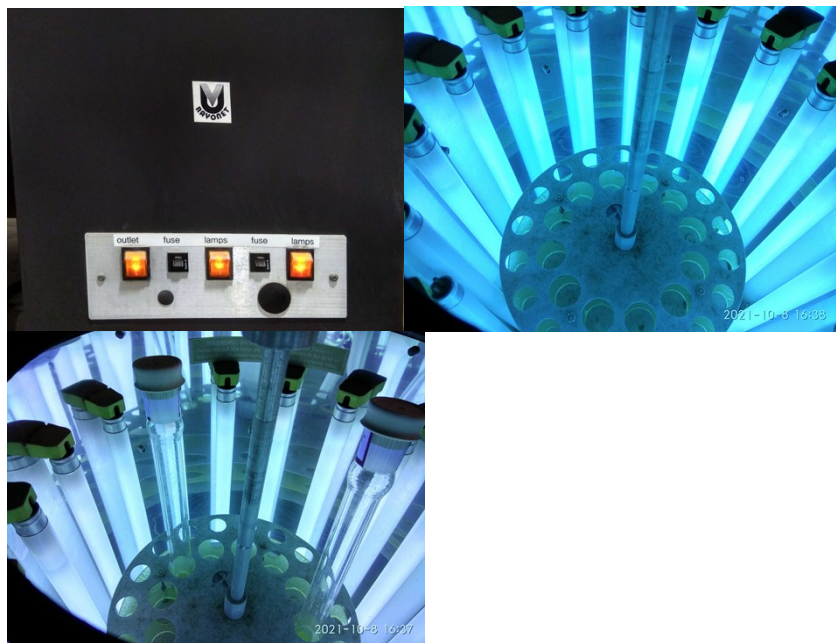

***UV-absorption spectroscopy studies of L1 and its potassium salt***

**L1 catalyst and its potassium salt in DMSO**

# Spectrum Measurement Report

Data set: File\_211122\_172113 - RawData

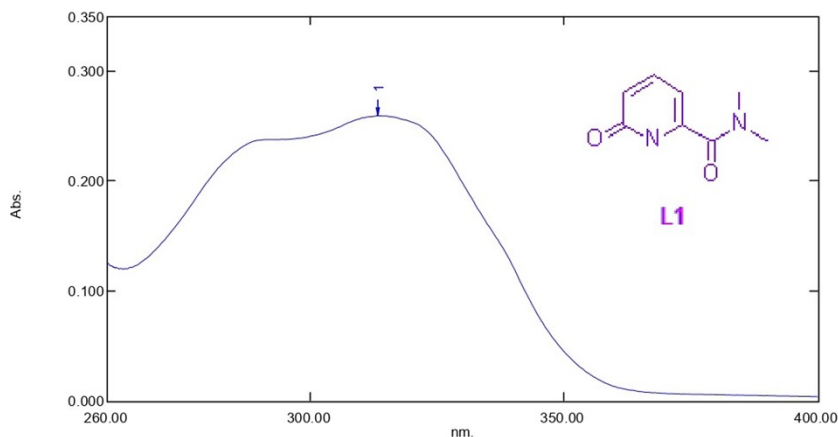

|                                                                                                                                                     |  |                                                                                                                                                                                           |  |
|-----------------------------------------------------------------------------------------------------------------------------------------------------|--|-------------------------------------------------------------------------------------------------------------------------------------------------------------------------------------------|--|
| <b>Software Information</b><br>Software Name: UVProbe<br>Version: 2.70<br>Mode: LabSolutions                                                        |  | <b>[Measurement Properties]</b><br>Wavelength Range (nm.): 250.00 to 400.00<br>Scan Speed: Fast<br>Sampling Interval: 0.1<br>Auto Sampling Interval: Enabled<br>Scan Mode: Single         |  |
| <b>Data Information</b><br>Data is: Original<br>Method: Default Project - L1-k-DMSO.smd                                                             |  | <b>[Instrument Properties]</b><br>Instrument Type: UV-1900 Series<br>Measuring Mode: Absorbance<br>Slit Width: 1.0 nm<br>Light Source Change Wavelength: 340.8 nm<br>S/R Exchange: Normal |  |
| Date/Time: 22-11-2021 17:22:21<br>Comments:                                                                                                         |  | <b>[Attachment Properties]</b><br>Attachment: None                                                                                                                                        |  |
| <b>Instrument Information</b><br>Instrument Name: TL150GUVH50-Instrument1<br>Instrument Type: UV-1900 Series<br>Model (S/N): UV-1900 (A12425680191) |  | <b>[Operation]</b><br>Threshold: 0.0010000<br>Points: 4<br>InterPolate: Disabled<br>Average: Disabled                                                                                     |  |
|                                                                                                                                                     |  | <b>[Sample Preparation Properties]</b><br>Weight:<br>Volume:<br>Dilution:<br>Path Length:<br>Additional Information:                                                                      |  |

<Peak Pick Table>

| No. | P/V | Wavelength | Abs.  | Description |
|-----|-----|------------|-------|-------------|
| 1   |     | 313.40     | 0.260 |             |
| 2   |     | 258.50     | 0.134 |             |
| 3   |     | 293.50     | 0.238 |             |
| 4   |     | 263.10     | 0.120 |             |



# Spectrum Measurement Report

Report Created: 22-11-2021 17:15:42

Data set: File\_211122\_170417 - RawData

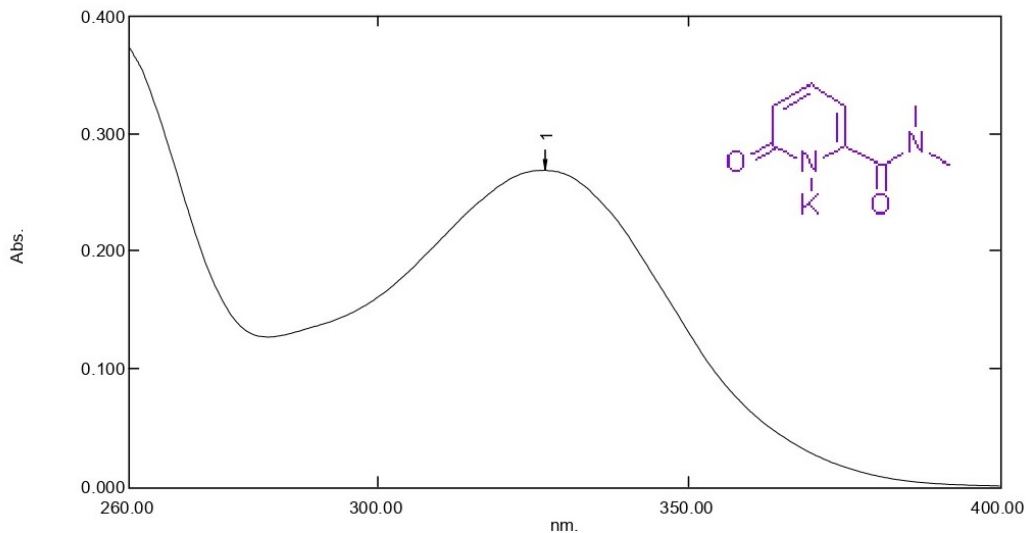

## Software Information

Software Name: UVProbe  
Version: 2.70  
Mode: LabSolutions

## Data Information

Data is: Original  
Method: Default Project - L1-k-DMSO.smd

Date/Time: 22-11-2021 17:05:29  
Comments:

## Instrument Information

Instrument Name: TL1150GUVH50-Instrument1  
Instrument Type: UV-1900 Series  
Model (S/N): UV-1900 (A12425680191)

## [Measurement Properties]

Wavelength Range (nm.): 250.00 to 400.00  
Scan Speed: Fast  
Sampling Interval: 0.1  
Auto Sampling Interval: Enabled  
Scan Mode: Single

## [Instrument Properties]

Instrument Type: UV-1900 Series  
Measuring Mode: Absorbance  
Slit Width: 1.0 nm  
Light Source Change Wavelength: 340.8 nm  
S/R Exchange: Normal

## [Attachment Properties]

Attachment: None

## [Operation]

Threshold: 0.0010000  
Points: 4  
InterPolate: Disabled  
Average: Disabled

## [Sample Preparation Properties]

Weight:  
Volume:  
Dilution:  
Path Length:  
Additional Information:

<Peak Pick Table>

| No. | P/V | Wavelength | Abs.   | Description |
|-----|-----|------------|--------|-------------|
| 1   | ⬆   | 326.90     | 0.269  |             |
| 2   | ⬆   | 259.10     | 0.378  |             |
| 3   | ⬆   | 251.40     | 0.019  |             |
| 4   | ⬇   | 282.30     | 0.127  |             |
| 5   | ⬇   | 251.90     | -2.329 |             |

### Spectrum Measurement Report

Report Created: 22-11-2021 20:22:13

Data set: File\_211122\_201902 - RawData

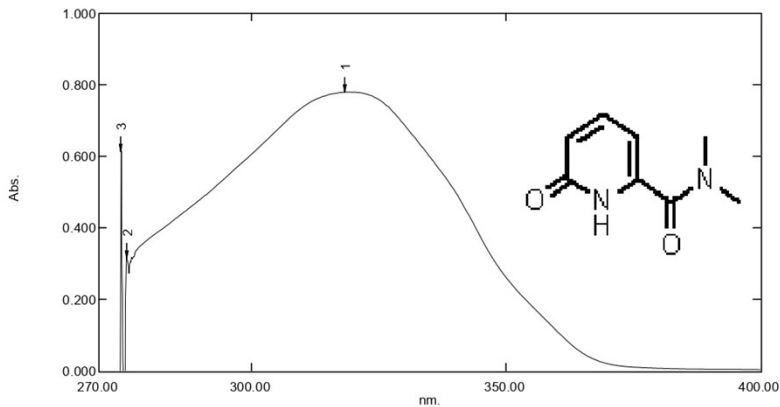

|                                           |                                          |
|-------------------------------------------|------------------------------------------|
| <b>Software Information</b>               | [Measurement Properties]                 |
| Software Name: UVProbe                    | Wavelength Range (nm.): 250.00 to 400.00 |
| Version: 2.70                             | Scan Speed: Fast                         |
| Mode: LabSolutions                        | Sampling Interval: 0.1                   |
|                                           | Auto Sampling Interval: Enabled          |
|                                           | Scan Mode: Single                        |
| <b>Data Information</b>                   | [Instrument Properties]                  |
| Data is: Original                         | Instrument Type: UV-1900 Series          |
| Method: Default Project - L1-benzene.smd  | Measuring Mode: Absorbance               |
|                                           | Slit Width: 1.0 nm                       |
| Date/Time: 22-11-2021 20:20:09            | Light Source Change Wavelength: 340.8 nm |
| Comments:                                 | S/R Exchange: Normal                     |
| <b>Instrument Information</b>             | [Attachment Properties]                  |
| Instrument Name: TL1150GUVH50-Instrument1 | Attachment: None                         |
| Instrument Type: UV-1900 Series           |                                          |
| Model (S/N): UV-1900 (A12425680191)       |                                          |
|                                           | [Operation]                              |
|                                           | Threshold: 0.0010000                     |
|                                           | Points: 4                                |
|                                           | InterPolate: Disabled                    |
|                                           | Average: Disabled                        |
|                                           | [Sample Preparation Properties]          |
|                                           | Weight:                                  |
|                                           | Volume:                                  |
|                                           | Dilution:                                |
|                                           | Path Length:                             |
|                                           | Additional Information:                  |

<Peak Pick Table>

| No. | P/V | Wavelength | Abs.   | Description |
|-----|-----|------------|--------|-------------|
| 1   | ●   | 318.40     | 0.780  |             |
| 2   | ●   | 275.40     | 0.316  |             |
| 3   | ●   | 274.40     | 0.615  |             |
| 4   | ●   | 272.60     | -0.278 |             |
| 5   | ●   | 268.90     | -0.623 |             |
| 6   | ●   | 265.40     | -1.015 |             |
| 7   | ●   | 263.00     | -0.406 |             |
| 8   | ●   | 254.60     | -0.845 |             |
| 9   | ●   | 251.90     | 0.333  |             |
| 10  | ●   | 275.90     | 0.272  |             |
| 11  | ●   | 275.00     | -0.262 |             |
| 12  | ●   | 273.40     | -1.738 |             |
| 13  | ●   | 271.50     | -3.001 |             |
| 14  | ●   | 266.60     | -3.337 |             |
| 15  | ●   | 263.60     | -3.400 |             |
| 16  | ●   | 258.40     | -4.000 |             |
| 17  | ●   | 252.40     | -3.718 |             |

# Spectrum Measurement Report

Data set: File\_211122\_202817 - RawData

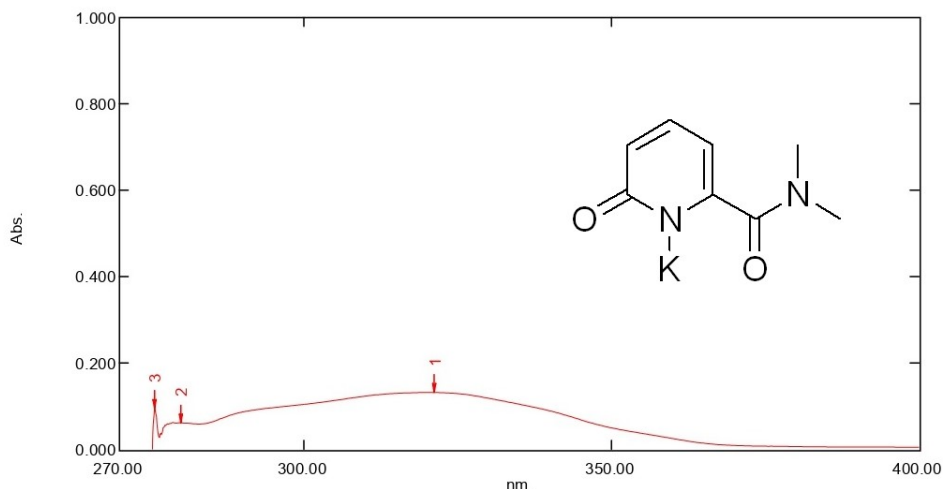

|                               |                                  |                                        |                  |
|-------------------------------|----------------------------------|----------------------------------------|------------------|
| <b>Software Information</b>   |                                  | <b>[Measurement Properties]</b>        |                  |
| Software Name:                | UVProbe                          | Wavelength Range (nm.):                | 250.00 to 400.00 |
| Version:                      | 2.70                             | Scan Speed:                            | Fast             |
| Mode:                         | LabSolutions                     | Sampling Interval:                     | 0.1              |
| <b>Data Information</b>       |                                  | Auto Sampling Interval:                | Enabled          |
| Data is:                      | Original                         | Scan Mode:                             | Single           |
| Method:                       | Default Project - L1-benzene.smd | <b>[Instrument Properties]</b>         |                  |
| Date/Time:                    | 22-11-2021 20:29:25              | Instrument Type:                       | UV-1900 Series   |
| Comments:                     |                                  | Measuring Mode:                        | Absorbance       |
| <b>Instrument Information</b> |                                  | Slit Width:                            | 1.0 nm           |
| Instrument Name:              | TL150GUVH50-Instrument1          | Light Source Change Wavelength:        | 340.8 nm         |
| Instrument Type:              | UV-1900 Series                   | S/R Exchange:                          | Normal           |
| Model (S/N):                  | UV-1900 (A12425680191)           | <b>[Attachment Properties]</b>         |                  |
|                               |                                  | Attachment:                            | None             |
|                               |                                  | <b>[Operation]</b>                     |                  |
|                               |                                  | Threshold:                             | 0.0010000        |
|                               |                                  | Points:                                | 4                |
|                               |                                  | InterPolate:                           | Disabled         |
|                               |                                  | Average:                               | Disabled         |
|                               |                                  | <b>[Sample Preparation Properties]</b> |                  |
|                               |                                  | Weight:                                |                  |
|                               |                                  | Volume:                                |                  |
|                               |                                  | Dilution:                              |                  |
|                               |                                  | Path Length:                           |                  |
|                               |                                  | Additional Information:                |                  |

<Peak Pick Table>

| No. | P/V | Wavelength | Abs.   | Description |
|-----|-----|------------|--------|-------------|
| 1   | ●   | 321.30     | 0.132  |             |
| 2   | ●   | 280.00     | 0.062  |             |
| 3   | ●   | 275.70     | 0.096  |             |
| 4   | ●   | 273.30     | -0.963 |             |
| 5   | ●   | 270.00     | -0.720 |             |
| 6   | ●   | 261.70     | -0.341 |             |
| 7   | ●   | 258.30     | -2.577 |             |
| 8   | ●   | 256.40     | -2.994 |             |
| 9   | ●   | 254.00     | -1.021 |             |
| 10  | ●   | 252.50     | -1.745 |             |
| 11  | ●   | 251.00     | -2.692 |             |
| 12  | ●   | 283.00     | 0.059  |             |
| 13  | ●   | 276.50     | 0.027  |             |
| 14  | ●   | 273.90     | -2.034 |             |
| 15  | ●   | 271.10     | -2.562 |             |
| 16  | ●   | 264.50     | -4.000 |             |
| 17  | ●   | 258.90     | -3.609 |             |
| 18  | ●   | 256.80     | -4.000 |             |
| 19  | ●   | 255.40     | -4.000 |             |
| 20  | ●   | 253.40     | -3.741 |             |
